# Cultivation and genomic analysis of *Candidatus Nitrosocaldus islandicus*, a novel obligately thermophilic ammonia-oxidizing *Thaumarchaeon*

5 Anne Daebeler<sup>1</sup>, Craig Herbold<sup>1</sup>, Julia Vierheilig<sup>1</sup>, Christopher J. Sedlacek<sup>1</sup>, Petra Pjevac<sup>1</sup>, Mads Albertsen<sup>2</sup>, Rasmus H. Kirkegaard<sup>2</sup>, José R. de la Torre<sup>3</sup>, Holger Daims<sup>1</sup>, Michael Wagner<sup>1</sup>

<sup>1</sup>Division of Microbial Ecology, Department of Microbiology and Ecosystem Science, Research Network “Chemistry meets Microbiology”, University of Vienna, Austria

10 <sup>2</sup>Center for Microbial Communities, Department of Chemistry and Bioscience, Aalborg University, Denmark

<sup>3</sup>Department of Biology, San Francisco State University, San Francisco, CA, USA

15 **Running title:** Cultivation and genomics of a novel *Nitrosocaldus* sp.

**Keywords:** AOA, thaumarchaea, thermophile, nitrification, hot spring, nirK, polymerase, anaerobic metabolism

20 **Corresponding authors:**

Anne Daebeler, University of Vienna, Division of Microbial Ecology, Althanstrasse 14, 1090 Vienna, Austria. Tel: +43 1 4277 76603, Email: [daebeler@microbial-ecology.net](mailto:daebeler@microbial-ecology.net)

Michael Wagner, University of Vienna, Division of Microbial Ecology, Althanstrasse 14, 1090 Vienna, Austria. Tel: +43 1 4277 76600, Email: [wagner@microbial-ecology.net](mailto:wagner@microbial-ecology.net)

25

## Abstract

Ammonia-oxidizing archaea (AOA) within the phylum *Thaumarchaea* are the only known aerobic ammonia oxidizers in geothermal environments. Although molecular data indicate the presence of phylogenetically diverse AOA from the *Nitrosocaldus* clade, group 1.1b and group 1.1a *Thaumarchaea* in terrestrial high-temperature habitats, only one enrichment culture of an AOA thriving above 50 °C has been reported and functionally analyzed. In this study, we physiologically and genomically characterized a novel *Thaumarchaeon* from the deep-branching *Nitrosocaldaceae* family of which we have obtained a high (~85 %) enrichment from biofilm of an Icelandic hot spring (73 °C). This AOA, which we provisionally refer to as “*Candidatus Nitrosocaldus islandicus*”, is an obligately thermophilic, aerobic chemolithoautotrophic ammonia oxidizer, which stoichiometrically converts ammonia to nitrite at temperatures between 50 °C and 70 °C. *Ca. N. islandicus* encodes the expected repertoire of enzymes proposed to be required for archaeal ammonia oxidation, but unexpectedly lacks a *nirK* gene and also possesses no identifiable other enzyme for nitric oxide (NO) generation. Nevertheless, ammonia oxidation by this AOA appears to be NO-dependent as *Ca. N. islandicus* is, like all other tested AOA, inhibited by the addition of an NO scavenger. Furthermore, comparative genomics revealed that *Ca. N. islandicus* has the potential for aromatic amino acid fermentation as its genome encodes an indolepyruvate oxidoreductase (*iorAB*) as well as a type 3b hydrogenase, which are not present in any other sequenced AOA. A further surprising genomic feature of this thermophilic ammonia oxidizer is the absence of DNA polymerase D genes – one of the predominant replicative DNA polymerases in all other ammonia-oxidizing *Thaumarchaea*. Collectively, our findings suggest that metabolic versatility and DNA replication might differ substantially between obligately thermophilic and other AOA.

## Introduction

*Thaumarchaea* (Brochier-Armanet *et al.*, 2008) are among the most abundant archaeal organisms on Earth, and thrive in most oxic environments (Francis *et al.*, 2007; Erguder *et al.*, 2009; Schleper and Nicol, 2010; Bouskill *et al.* 2012; Prosser and Nicol, 2012; Stahl and de la Torre, 2012; Stieglmeier *et al.*, 2014a), but have also been detected in anoxic systems (Molina *et al.*, 2010; Bouskill *et al.*, 2012; Buckles *et al.*, 2013; Beam *et al.*, 2014; Lin *et al.*, 2015). This phylum comprises ammonia-oxidizing archaea (AOA) and other archaeal taxa in which ammonia oxidation has not been demonstrated. All cultured members of the *Thaumarchaea* are AOA and grow by using ammonia, urea or cyanate as substrate (Palatinszky *et al.* 2015; Bayer *et al.* 2016; Sauder *et al.* 2017; Qin *et al.* 2017a), although *in situ* experiments suggest that certain members of this phylum capable of ammonia oxidation also possess other lifestyles (Mußmann *et al.* 2011; Sauder *et al.* 2017). In aquatic and terrestrial environments *Thaumarchaea* often co-occur with ammonia-oxidizing bacteria (AOB), and frequently outnumber them by orders of magnitude (Francis *et al.*, 2005; Leininger *et al.*, 2006; Mincer *et al.*, 2007; Adair and Schwarz, 2008; Abell *et al.*, 2010; Mußmann *et al.*, 2011; Zeglin *et al.*, 2011; Daebeler *et al.*, 2012). *Thaumarchaea* also inhabit extreme environments like terrestrial hot springs and other high temperature habitats, where AOB are not detectable (Weidler *et al.*, 2007; Reigstad *et al.*, 2008; Wang *et al.*, 2009; Zhao *et al.*, 2011; Chen *et al.*, 2016). In addition to the presence of *Thaumarchaea* in hot environments, high *in situ* nitrification rates (Reigstad *et al.*, 2008; Dodsworth *et al.*, 2011; Chen *et al.*, 2016) and transcription of genes involved in archaeal ammonia oxidation in several hot springs over 74 °C (Zhang *et al.*, 2008; Jiang *et al.*, 2010) support an important role of thermophilic AOA in these systems.

Despite their apparent importance for nitrogen cycling in a wide range of thermal habitats, only one thermophilic [on the basis of the definition by Stetter (1998) that thermophiles grow optimally above 50 °C] AOA species from an enrichment culture has been reported to date (de la Torre *et al.*, 2008; Qin *et al.*, 2017b) and was named *Candidatus* (Ca.) *Nitrosocaldus yellowstonensis*. In addition, several enrichment cultures and one pure culture of moderately thermophilic AOA, which are able to grow at 50 °C, but grow optimally only at temperatures below 50 °C, have been described (Hatzenpichler *et al.*, 2008; Lebedeva *et al.*, 2013; Palatinszky *et al.*, 2015). Therefore, our current knowledge on specific adaptations or metabolic capabilities of thermophilic AOA growing preferably at temperatures above 50 °C is very limited (Spang *et al.*, 2012).

In 16S rRNA and ammonia monooxygenase subunit A (*amoA*) gene trees *Ca.* *Nitrosocaldus yellowstonensis* branches most deeply among *Thaumarchaea* that possess ammonia monooxygenase (AMO) genes. In consequence, the *Nitrosocaldales* clade has been considered as being close to the evolutionary origin of *Thaumarchaea* encoding the genetic repertoire for ammonia oxidation (Spang *et al.* 2017, de la Torre *et al.*, 2008). However, since the genome sequence of *Ca.* *N. yellowstonensis* is not yet published, phylogenomic analysis to confirm an ancestral position of the *Nitrosocaldales* relative to other *Thaumarchaea* have been pending.

Here we report on the enrichment, phylogenomic analyses, and selected (putative) metabolic features of a novel, obligately thermophilic, AOA from the *Nitrosocaldales* clade obtained from a biofilm collected from an Icelandic hot (73 °C) spring. This organism, provisionally referred to as *Ca.* *Nitrosocaldus islandicus*, occupies a fundamentally different niche compared to other genomically characterized AOA as its ammonia-oxidizing activity is restricted to temperatures ranging from 50 °C to 70 °C.

## Materials and Methods

### *Enrichment, cultivation, and physiological experiments*

The enrichment of *Ca.* *N. islandicus* was initiated by inoculation of 40 ml sterile mineral medium (Koch *et al.*, 2015) containing 0.5 mM filter-sterilized NH<sub>4</sub>Cl with approximately 0.1 g of hot spring biofilm, which had been submerged in running water at the sampling site in a geothermal area in Graendalur valley, (64° 1' 7" N, 21° 11' 20" W) Iceland. At the sampling site, the spring had

a pH of 6.5 and a temperature of 73 °C. The culture was initially incubated without agitation in 100 ml glass bottles in the dark at 60 °C and checked weekly for ammonium and nitrite content of the medium by using Nessler's reagent (K<sub>2</sub>HgI<sub>4</sub> – KOH solution; Sigma-Aldrich) and nitrite/nitrate test stripes (Merckoquant; Merck). Ammonium (1 mM NH<sub>4</sub>Cl) was replenished when completely consumed. At the same time pH was monitored by using pH test stripes (Machery-Nagel) and kept at pH 7–8 by titration with NaHCO<sub>3</sub>. When the pH dropped below 6 the enrichment culture ceased to oxidize ammonia, but activity was restored by readjusting the pH to between 7 and 8. The ammonium and nitrite concentrations were quantified photometrically (Kandeler and Gerber, 1988; Miranda *et al.*, 2001) using an Infinite 200 Pro spectrophotometer (Tecan Group AG). The microbial community composition of the enrichment was regularly monitored by fluorescence *in situ* hybridization (FISH) with 16S rRNA-targeted probes labeled with dyes Cy3, Cy5, or Fluos as described elsewhere (Daims *et al.*, 2005). Probes targeting most bacteria (EUB338 probe mix; Amann *et al.*, 1990; Daims *et al.*, 1999), most archaea (Arch915, Stahl and Amann, 1991) and most *Thaumarchaea* (Thaum726, Beam, 2015) were applied. All positive results were verified using the nonsense probe nonEUB338 (Wallner *et al.* 1993) labeled with the same dyes. Treatments with the macrolide antibiotic spiramycin (15 mg l<sup>-1</sup>), which partly retains its antibacterial activity at 60 °C (Zorraquinio *et al.*, 2011), were performed as described in Zhang *et al.* (2015) together with serial dilutions ranging from 10<sup>-5</sup> to 10<sup>-8</sup> to obtain a highly enriched (~ 85 %) AOA culture that was used for further characterization.

Growth rates of *Ca. N. islandicus* were determined across a range of incubation temperatures (50 °C to 70 °C). Triplicate cultures (25 ml) and negative controls (cultures not supplied with ammonium or inoculated with autoclaved biomass) were incubated for ten days in 100 ml Schott bottles without agitation in the dark at the respective temperature. Samples from these experiments were either stored at -20 °C for subsequent qPCR analyses (150 µl) or centrifuged (21,000 x g, 15min, 18 °C) to remove cells and the supernatant was stored at -20 °C for chemical analysis (600 µl). qPCR analysis with primers CrenamoA19F (Leininger *et al.* 2006) and CrenamoA616R (Tournu *et al.*, 2008) targeting the archaeal *amoA* gene was otherwise performed as described in Pjevac *et al.* (2017) before the genome sequence of *Ca. N. islandicus* was available. However, subsequent analysis demonstrated that the employed qPCR primers contain mismatches to the *amoA* sequence of this AOA in the middle of the forward and reverse primer. The specific growth rate was calculated from log-linear plots of *amoA* gene abundance in individual cultures. In this analysis, three out of seven time points were interpolated through linear regression.

To test whether the NO-scavenger 2-phenyl-4,4,5,5-tetramethylimidazoline-3-oxide-1-oxyl (PTIO; TCI, Germany) inhibits ammonia oxidation by *Ca. N. islandicus*, 40 ml aliquots of mineral medium containing 1 mM ammonium were inoculated with 10 % (v/v) of an exponential-phase culture and incubated in duplicates in the presence of 0, 33, and 100 µM PTIO, respectively. PTIO was dissolved in sterile mineral medium before addition to the cultures. The cultures not exposed to PTIO were supplemented with the same volume of sterile medium. The cultures were sampled (2 ml) at the beginning of the experiment and after 15 days of incubation. Nitrite and ammonium concentrations were measured as described above.

#### *DNA extraction, genome sequencing, and annotation*

DNA from three replicate enrichment cultures containing *Ca. N. islandicus* as the only detectable ammonia oxidizer was extracted as described by Angel and Conrad (2013) and sequenced by Illumina HiSeq next generation sequencing (250 bp paired end reads). Since we did not obtain a complete genome with this approach we re-extracted genomic DNA from the enrichment at a later stage according to Zhou *et al.* (1996) yielding high molecular weight DNA. Genomic DNA was then sheared in a Covaris g-TUBE (Covaris, USA) at 9000 RPM for 2x 1 min. in an Eppendorf mini spin plus centrifuge (Eppendorf, DE). The DNA was run on a E-Gel™ EX 1 % agarose gel (ThermoFisher, USA) and small DNA fragments were removed by excising a band with a length of

~8 kb. The DNA was purified from the gel cut using the ultraClean 15 DNA Purification Kit (Qiagen, USA). The DNA was prepared for sequencing using the “1D Low Input gDNA with PCR SQK-LSK108” protocol (Oxford Nanopore Technologies, UK) and sequenced on a FLO-MIN106 flowcell using the MinION MK1b (Oxford Nanopore Technologies, UK) following the manufacturers protocol using MinKNOW (v. 1.7.14). The nanopore reads were basecalled using Albacore (V. 2.0.1) (Oxford Nanopore Technologies, UK). The complete genome was assembled using a hybrid approach combining the data from the Illumina and nanopore sequencing with the hybrid assembler Unicycler (v. 0.4.1, Wick et al., 2017). The genome bins of the two contaminating organisms were assembled from the Nanopore reads using Miniasm (Li et al., 2016) and polished twice with the Nanopore reads using Racon (Vaser et al., 2017). No other microbe encoding genes indicative for ammonia-oxidation was identified in either of the two the metagenomes.

The complete genome of *Ca. N. islandicus* was uploaded to the MicroScope platform (Vallenet et al., 2013) for automatic annotation, which was amended manually where necessary. The full genome sequence of *Ca. N. islandicus* has been deposited in GenBank (accession CP024014) and associated annotations are publicly available in MicroScope (*Candidatus Nitrosocaldus islandicus* strain 3F).

Protein-coding genes from the novel *Thaumarchaeon* were compared to those from 30 *Thaumarchaea* with available genomic data (Table S1) downloaded from NCBI. The coding sequences (CDS) with accession numbers from each genome, as downloaded from NCBI, were combined with additional CDS predictions made by Prodigal (Hyatt et al., 2010) to account for variability in CDS predictions from different primary data providers and platforms. Predicted CDS from the novel *Thaumarchaeon* were aligned to CDS from reference genomes using blastp (Word\_size=2, substitution matrix BLOSUM45). Genes were considered homologous only if the blastp alignment exceeded 50 % of the length of both query and subject sequences. CDS of *Ca. N. islandicus* that lacked any homologs in other *Thaumarchaea* were considered “unique”. Unique CDS of unknown function were searched for secretion signals and for predicted membrane-spanning domains of the encoded proteins using the Phobius web server (Käll et al., 2007) and putative structures were determined using the Phyre2 web server (Kelley et al., 2015). Homology to “*Thaumarchaea*-core” proteins was assessed by cross-referencing the blastp homology search to the proteins defined for *Ca. Nitrosotalea devanaterre* by Herbold et al. (2017).

### Phylogenetic analysis and habitat preference

For 16S rRNA and *amoA* gene-based phylogenetic analysis, the full-length 16S rRNA and *amoA* gene sequences of *Ca. N. islandicus* retrieved from the genome assembly were imported into the ARB software package (Ludwig et al., 2004) together with other full length 16S rRNA or *amoA* gene sequences from cultivated AOA strains and aligned with the integrated ARB aligner with manual curation. 171 sequences from the *Aigarchaea* were included in the alignment and used as outgroup in the 16S rRNA gene phylogenetic analyses. For the *amoA* gene phylogenetic analyses no outgroup was selected. The 16S rRNA and *amoA* gene consensus trees were reconstructed using Maximum-Likelihood (ML; using the GTRGAMMA evolution model), Neighbour Joining (NJ) and Maximum Parsimony (MP) methods. For all calculations, a sequence filter considering only positions conserved in ≥50 % of all *thaumarchaeal* and *aigarchaeal* sequences was used, resulting in 2444 and 488 alignment positions for the 16S rRNA and *amoA* genes, respectively.

A Bayesian-inference phylogenomic tree was obtained using the automatically generated alignment of 34 concatenated universal marker genes (Table S2), which were identified by CheckM in Parks et al. (2015). This alignment was used as input for PhyloBayes (Lartillot et al., 2009) with ten independent chains of 4,000 generations using the CAT-GTR model; 2,000 generations of each chain were discarded as burn-in, the remainder were subsampled every second tree (bpcomp -x 2000 2 4000) and pooled together for calculation of posterior probabilities.



Whole-genome based average nucleotide identity (gANI, Varghese *et al.*, 2015) and average amino acid identity values (AAI, Konstantinidis and Tiedje, 2005) were calculated between the genomes of *Ca. N. islandicus* and *Ca. N. yellowstonensis* using sets of annotated genes supplemented with additional gene calls predicted by Prodigal (Hyatt *et al.*, 2010). gANI was calculated using the Microbial Species Identifier (MiSI) method (Varghese *et al.*, 2015). For AAI, bidirectional best hits were identified using blastp, requiring that query genes aligned over at least 70 % of their length to target genes (in each unidirectional blastp search). Query gene length was used to calculate a weighted average % identity over all best hit pairs and the calculations were repeated using each genome as query and target.

The occurrence of organisms closely related to *Ca. N. islandicus* and *Ca. N. yellowstonensis* in publicly deposited amplicon sequencing data sets was assessed using IMNGS (Lagkouvardos *et al.*, 2016) with the full-length 16S rRNA gene sequences of both organisms as query and a nucleotide identity threshold of 97 %.

*PolB* amino acid sequences were extracted from the arCOG database (arCOG14 <ftp://ftp.ncbi.nih.gov/pub/wolf/COGs/arCOG/> (arCOG15272, arCOG00329, arCOG00328, arCOG04926, arCOG15270). Additional *thaumarchaeal polB* sequences were identified using *Ca. N. islandicus* as a query in a blastp search against the nr protein database. These additional *thaumarchaeal* sequences, the *polB* sequence from *Ca. N. islandicus* and arCOG database sequences were de-replicated using usearch (Edgar, 2010) with -sortbylength and -cluster\_smallmem (-id 0.99 -query\_cov 0.9), aligned using default settings in mafft (Katoh and Standley, 2013) and a phylogenetic tree was calculated using FastTree (Price *et al.*, 2010).

Nitrilase superfamily amino acid sequences were obtained from Pace and Brenner (2001). Alignment and phylogenetic reconstruction was carried out with Bali-Phy (Suchard and Redelings, 2006; randomize alignment, iterations=11000, burnin=6000). Posterior tree pools from 10 independent runs were combined to generate a 50 % PP consensus tree and to assess bipartition support.

A dataset for assessing the phylogenetic relationship of the alpha subunit of 2-oxoacid:ferredoxin oxidoreductases (OFORs) was based on Gibson *et al.* (2016) and supplemented with additional indolepyruvate oxidoreductase (*ior*) sequences. Genomes available (as of October 30, 2017) from the NCBI genomes database were downloaded, genes were predicted using Prodigal V2.6.3 (Hyatt *et al.*, 2010) and predicted genes were screened for *iorA* (TIGRFAM03336) using hmmsearch v3.1b2 (hmmer.org) with an e-value cutoff of 0.001. Genes meeting the search criteria were used as queries against the complete TIGRFAM database to ensure that the extracted *iorA* sequences matched the *iorA* model as the best-hit model with an e-value cutoff of 0.001. Reciprocal best-hit genes were required to align to the hmm over at least 500 contiguous bases. Amino acid sequences were then clustered into centroids using usearch v8.0.1517 (sortbylength and cluster\_smallmem -id 0.8 -query\_cov 0.9; Edgar, 2010). Centroids were aligned using mafft v7.245 (Katoh and Standley, 2013) and trees were constructed using FastTree 2.1.4 (Price *et al.*, 2010). The initial phylogenetic placement of *Ca. N. islandicus iorA* in the resulting large tree (3,179 sequences) was used to choose a small set of bacterial *iorA* sequences to include in the final tree. The final dataset was aligned using mafft v7.245 (Katoh and Standley, 2013) and trees were constructed using FastTree 2.1.4 (Price *et al.*, 2010).

### Electron microscopy

For scanning electron microscopy, *Ca. N. islandicus* cells were harvested by centrifugation (4,500 x g, 15 min, 25 °C) and fixed on poly-L-lysine coated slides with a filter-sterilized 2.5 % glutaraldehyde fixation solution in phosphate buffered saline (PBS; 130 mM NaCl in 5 % [v/v] phosphate buffer mixture [20 to 80 v/v] of 200 mM NaH<sub>2</sub>PO<sub>4</sub> and 200 mM Na<sub>2</sub>HPO<sub>4</sub>). Subsequently, fixed cells were washed three times for 10 min in PBS and post-fixed with a 1 % OsO<sub>4</sub> solution in PBS for 40 min. The fixed cells were again washed three times in PBS, dehydrated

250 in a 30 to 100 % (v/v) ethanol series, washed in acetone, and critical point dried with a CPD 300 unit (Leica). Samples were mounted on stubs, sputter coated with gold using a sputter coater JFC-2300HR (JEOL), and images were obtained with a JSM-IT300 scanning electron microscope (JEOL).

## 255 Results and Discussion

### *Enrichment and basic physiology of Ca. N. islandicus*

An ammonia-oxidizing enrichment culture was established from biofilm material sampled from a hot spring located in the geothermal valley Graendalur of South-Western Iceland. Temperature tests  
260 for optimal activity and growth were performed at different time points during the enrichment period and showed varying results, but below 50 °C and above 75 °C activity and growth was never observed. Only during the initial enrichment phase did ammonia oxidation occur at 75 °C. At 65 °C the highest ammonia oxidation rates and the shortest lag phases were usually measured (data not shown), however in a single experiment the optimal temperature was 70 °C (Fig. S1). Likely, these  
265 variations reflect varying abundance ratios of *Ca. N. islandicus* and accompanying bacteria over time as described in Lebedeva *et al.* (2008). A high enrichment level of a single AOA phylotype (see below) was achieved by applying the antibiotic spiramycin (15 mg l<sup>-1</sup>) followed by biomass transfers into fresh medium using serial dilutions. This enrichment culture showed near stoichiometric conversion of ammonium to nitrite when incubated at 65 °C (Fig. 1). This was  
270 accompanied by growth of the AOA with a specific growth rate of  $0.128 \pm 0.011$  d<sup>-1</sup> (mean generation time of  $2.32 \pm 0.24$  d), which is substantially slower than those reported for *Ca. Nitrosocaldus yellowstonensis* HL72, *N. viennensis* EN76, or *N. maritimus* SCM1 (de la Torre *et al.*, 2008; Könneke *et al.*, 2005; Martens-Habbena *et al.*, 2009; Stieglmeier *et al.*, 2014b; Table 1), but faster than a marine enrichment culture (Berg *et al.*, 2015).

### 275 *Genome reconstruction, phylogeny, and environmental distribution*

Metagenomic sequencing of the enrichment culture with Illumina and Nanopore demonstrated that the current culture contained an AOA as the only taxon encoding the repertoire genes required for ammonia oxidation. Hybrid assembly allowed reconstruction of the complete genome of this AOA  
280 as one circular contiguous sequence of 1.62 Mbps length (Table 1). The 16S rRNA gene and *amoA* gene of the newly enriched AOA are 96 and 85 % identical respectively to the genes of *Ca. Nitrosocaldus yellowstonensis*, the only other cultured obligately thermophilic AOA. The average amino acid sequence identity (AAI) and the genomic average nucleotide identity (gANI) between the genome and the one of *Ca. N. yellowstonensis* are 65.4 % (alignment fraction: 0.86) and 75.8 %  
285 (alignment fraction: 0.59), respectively, which is above the proposed genus and below the proposed species boundary thresholds (Qin *et al.*, 2014; Varghese *et al.*, 2015). Consequently, the enriched obligately thermophilic AOA was assigned to the same genus and referred to as *Ca. Nitrosocaldus islandicus*. According to 16S rRNA gene- and *amoA* gene-based phylogenies, *Ca. N. islandicus* is a novel member of the *Nitrosocaldales* clade, which seems to predominantly encompass AOA from  
290 thermal environments (Fig. 2). An extended phylogenomic analysis using a concatenated alignment of 34 proteins (Table S2) identified by CheckM (Parks *et al.*, 2015) confirmed that *Ca. N. islandicus* represents a basal lineage within the known ammonia-oxidizing *Thaumarchaea* (Fig. 3). This result lends strong support to the earlier notion, which was based on single-gene 16S rRNA and *amoA* phylogenies (de la Torre *et al.*, 2008), that the thermophilic *Nitrosocaldales* clade is an early  
295 diverging group of the ammonia-oxidizing *Thaumarchaea*. It would also be compatible with the possibility that archaeal ammonia oxidation originated in thermal environments (de la Torre *et al.*, 2008; Hatzenpichler *et al.*, 2008; Groussin *et al.*, 2011; Brochier-Armanet *et al.*, 2012).

Metagenomic sequencing revealed that in addition to *Ca. N. islandicus* the culture also contained two heterotrophic bacterial contaminants, which were identified as a *Thermus sp.* and a member of

the *Chloroflexi* phylum (Fig. 4). The enrichment level of *Ca. N. islandicus* was approximately 85 % based on read counts from the Nanopore sequencing, whereas the *Thermus sp.* and *Chloroflexi* accounted for 12 % and 3 %, respectively. FISH-analysis of the enrichment culture confirmed the dominance of *Ca. N. islandicus* and showed that the AOA grew mainly in aggregates, whereas the bacterial cells grew either co-localized with the archaeal flocs or planktonic (Fig. 5A). Electron microscopy demonstrated that the cells of *Ca. N. islandicus* are small (with a diameter of approximately 0.5 to 0.7  $\mu\text{m}$ ) and have an irregular coccoid shape (Fig. 5B). Morphologically they resemble the cells of *Ca. N. yellowstonensis* (Qin *et al.*, 2017b).  
The environmental distribution of the two cultured *Nitrosocaldales* members and closely related AOA was assessed by screening all publicly available 16S rRNA gene amplicon datasets (n=93,045) for sequences highly similar (97 %) to the 16S rRNA genes of *Ca. N. islandicus* and *Ca. N. yellowstonensis* using the pipeline described by Lagkouvardos *et al.* (2016). This analysis revealed that these taxa are highly confined in their distribution and occur predominantly in terrestrial hot springs where they can reach high relative abundances between 11.4 % and 86 % (*Ca. N. islandicus* and *Ca. N. yellowstonensis*, respectively) of the total microbial community (Fig. 6). Interestingly, *Ca. N. yellowstonensis*-related organisms seem to occur mainly in hot springs described as alkaline with a pH of around 8.5, but were also detected in a sample from a Tibetan wastewater treatment plant (Niu *et al.*, 2017). The unexpected detection of members of the *Nitrosocaldales* in the latter sample was confirmed by 16S rRNA-based phylogenetic analyses (data not shown) and it would be interesting to know whether this wastewater treatment plant is in some way connected to water from a close-by hot spring.

### Genome features

Addition of the complete genome of *Ca. N. islandicus* to the set of available thaumarchaeal genome sequences (n=30) reduced the number of gene families identified as representing the “*Thaumarchaea*-core” (Herbold *et al.*, 2017) from 743 to 669 (reduction by 9.96 %; Table S3). In a few cases, genes with low sequence homology to apparently absent core gene families are actually present in the genome of *Ca. N. islandicus*, but were not scored as they did not match the alignment length criterion. For example, *Ca. N. islandicus*, like all other AOA sequenced to date, has a gene encoding the K-subunit of RNA polymerase class I, but with a low sequence similarity to the respective orthologous genes in other AOA. In a few other cases, enzymes found in all other AOA genomes are absent but functionally replaced by members of different enzyme families. For example, all other genome-sequenced AOA contain a cobalamin-dependent methionine synthase. In contrast, *Ca. N. islandicus* possesses only an unrelated cobalamin-independent methionine synthase, which is also found in some other AOA.

In addition to updating the *thaumarchaeal* core genome we also specifically looked for genes that are present in *Ca. N. islandicus*, but were not reported for other AOA before. In the following sections, the most interesting findings from these analyses are reported and put in context.

Like all other AOA, the *Ca. N. islandicus* genome encodes the typical repertoire for CO<sub>2</sub> fixation via the modified 3-hydroxypropionate/4-hydroxybutyrate (3HP/4HB) cycle and for archaeal ammonia oxidation (Fig. 7; Fig. S2; Table 1) (Walker *et al.*, 2010; Spang *et al.*, 2012; Könneke *et al.*, 2014; Otte *et al.*, 2015; Kerou *et al.*, 2016). Unexpectedly however, the gene *nirK* encoding an NO-forming nitrite reductase is absent. NirK has been suggested to play an essential role for ammonia oxidation in AOA by providing NO for the NO-dependent dehydrogenation of hydroxylamine to nitrite (Kozłowski *et al.*, 2016). Interestingly, ammonia oxidation by *Ca. N. islandicus* was completely inhibited after the addition of  $\geq 33 \mu\text{M}$  of the NO-scavenger PTIO (Fig. S3), a concentration that is lower or in the same range as previously reported to be inhibitory for other AOA (Shen *et al.*, 2013; Jung *et al.*, 2014; Martens-Habbena *et al.*, 2015; Sauder *et al.*, 2016).



350 This finding suggests that NO is required for ammonia oxidation in *Ca. N. islandicus* despite the absence of NirK. The only other known AOA without a *nirK* gene are the sponge symbiont *Cenarchaeum symbiosum* (Hallam *et al.*, 2006; Bartossek *et al.*, 2010) and *Ca. N. yellowstonensis* (Stahl and de la Torre, 2012). For the uncultured *C. symbiosum* ammonia-oxidizing activity has not been demonstrated and the absence of *nirK* might have resulted from gene loss during adaptation to a life-style as symbiont. *Ca. N. yellowstonensis* is the closest cultured representative of *Ca. N. islandicus*, and the lack of *nirK* may thus be a common feature of the *Nitrosocaldales*. These AOA might produce NO by a yet unknown mechanism. In this context it is interesting to note that the hydroxylamine dehydrogenase of AOB, of which the functional homolog in archaea has not been identified yet, has recently been reported to produce NO instead of nitrite (Caranto and Lancaster, 2017). Alternatively, NO could be provided by accompanying organisms such as the *Thermus* and *Chloroflexi*-like bacteria that remain in the enrichment. Indeed, the genome bins obtained for these organisms both encode a *nirK* gene. The *Thermus sp.* genome bin further contains a *norBC* and *narGH* genes, in line with described denitrification capabilities for the genus *Thermus* (Alvarez *et al.*, 2014). A dependence of *Nitrosocaldales* on NO production by other microorganisms could explain why no pure culture from this lineage has been obtained yet.

*Ca. N. islandicus* possesses genes coding for urease that are present in some but not all AOA (Walker *et al.*, 2010; Spang *et al.*, 2012; Kerou *et al.*, 2016; Lehtovirta-Morley *et al.*, 2016; Sauder *et al.*, 2017) (Fig. 7; Table 1), but lacks a cyanase that is used by *Nitrososphaera gargensis* for cyanate-based growth (Palatinszky *et al.*, 2015). Additionally, the genome encodes an enzyme that either belongs to a novel class of the nitrilase superfamily or to the cyanide hydratase family (Fig. 7; Fig. S4). Nitrilases catalyze the direct cleavage of a nitrile to the corresponding acid while forming ammonia (Pace and Brenner, 2001) and cyanide hydratases convert HCN to formamide. Both substrates are relatively thermostable (Miyakawa *et al.*, 2002; Isidorov *et al.*, 1992). Nitriles occur as intermediates of microbial metabolism (Kobayashi *et al.*, 1993) and nitrile hydratases have previously been isolated from several thermophiles (Cramp *et al.*, 1997; Almatawah *et al.*, 1999; Kabaivanova *et al.*, 2008). Furthermore, both compounds are intermediates of the proposed abiotic synthesis of organics at hydrothermal sites (Miller and Urey, 1959; Schulte and Shock, 2005) and could thus be available in the hot spring habitat of *Ca. N. islandicus*. Similar genes have been found in the genomes of several other AOA from the *Nitrosopumilus* and *Nitrosotenuis* genera (Walker *et al.*, 2010; Mosier *et al.*, 2012; Lebedeva *et al.*, 2013; Park *et al.*, 2014; Bayer *et al.*, 2016) (Table 1) and it will be interesting to find out for which metabolism they may be used in AOA.

Intriguingly, *Ca. N. islandicus* might be able to ferment amino acids under anaerobic conditions as it contains the entire pathway used by some hyperthermophilic archaea for ATP generation from aromatic amino acids (Mai and Adams, 1994; Adams *et al.*, 2001; Ozawa *et al.*, 2012) (Fig. 7). In this pathway arylpyruvates are formed from aromatic amino acids by the activity of amino acid aminotransferases using 2-oxoglutarate as the amine group acceptor. The glutamate produced by this transamination can be recycled back to 2-oxoglutarate via glutamate dehydrogenase (*gdhA*) with the concomitant reduction of NADP<sup>+</sup>. With *ilvE* and *aspC* genes present, *Ca. N. islandicus* encodes at least two enzymes for which an aminotransferase activity specific for tyrosine, phenylalanine and aspartate has been demonstrated (Gelfand and Steinberg, 1977). Subsequently, these 2-ketoacids could be oxidatively decarboxylated and converted to aryl-CoAs by the oxygen-sensitive enzyme indolepyruvate oxidoreductase (Ozawa *et al.*, 2012) encoded by *iorAB* using oxidized ferredoxin as electron acceptor. *IorAB* is absent from all other genome-sequenced AOA and the *ior* genes present in *Ca. N. islandicus* have the highest similarity to and cluster together with *iorAB*-genes found in *Kyrpidia tusciae* and *Dadabacteria* (Fig. S5). Finally, transformation of aryl-CoAs to aryl acids catalyzed by ADP-dependent acetyl-CoA/acyl-CoA synthetase (Glasemacher *et al.*, 1997) leads to ATP formation via substrate-level phosphorylation (Fig. 7). *Ca. N. islandicus* encodes four acetyl-CoA/ acyl-CoA synthetases, two of which are most similar to

400 non-syntenous homologs of acetyl-CoA/ acyl-CoA synthetases found in other AOA. However, the third gene is absent in all other AOA to date and its most similar homologs are encoded by species of the peptidolysing thermophilic archaea *Thermoproteus* and *Sulfolobus* and the fourth is most similar to an acetyl-/ acyl-CoA synthetase found in members of the thermophilic *Bathyarchaea* and *Hadesarchaea*.

405 The fermentation of aromatic amino acids also requires regeneration of oxidized ferredoxin (reduced by IorAB) and NADP<sup>+</sup> (reduced by glutamate dehydrogenase). However, no canonical ferredoxin:NADP<sup>+</sup> oxidoreductase, or other enzymes (Buckel and Thauer, 2013) described to regenerate oxidized ferredoxin, are encoded in the genome of *Ca. N. islandicus*. It seems unlikely that the amount of ferredoxin oxidized by an encoded ferredoxin-dependent assimilatory sulfite/nitrite reductase (Fig. 7) would be sufficient to compensate for all ferredoxin reduced in the dissimilatory fermentation pathway. However, *Ca. N. islandicus* can also oxidize reduced ferredoxin with a 2:oxoglutarate-ferredoxin oxidoreductase (Fig. S5). NAD(P)H can be re-oxidized by a cytosolic, bidirectional, NAD(P)-coupled type 3b [NiFe] –hydrogenase that is encoded by *Ca. N. islandicus* in contrast to all other genomically characterized AOA (Fig. 7; Table 1). NAD(P)H oxidation by this hydrogenase could lead to hydrogen generation, or the enzyme could act as a

410 sulfhydrogenase that reduces zero valent sulfur compounds (produced by other organisms or present in the environment) to hydrogen sulfide (Ma *et al.*, 1993, Adams *et al.*, 2001). The hydrogenase genes are clustered at a single locus and code for the four subunits of the holoenzyme and accessory proteins (Fig. S6). This hydrogenase might also allow *Ca. N. islandicus* to use hydrogen as energy

415 source providing reduced NAD(P)H under oxic conditions as this type of hydrogenase has been shown to tolerate exposure to oxygen (Bryant and Adams, 1989; Berney *et al.*, 2014; Kwan *et al.*, 2015).

Surprisingly, the genome of *Ca. N. islandicus* lacks genes for both subunits of the DNA polymerase D (PolD), which is present in all other AOA and most archaeal lineages (including thermophiles)

425 with the exception of the Crenarchaea (Cann *et al.*, 1998; Makarova *et al.*, 2014, Saw *et al.*, 2015) (Table 1). It is assumed that either PolD alone or together with DNA polymerases of the B family (PolB) is required for DNA synthesis and elongation in these archaea (Čuboňová *et al.*, 2013; Ishino and Ishino, 2013; Makarova *et al.*, 2014). The *Ca. N. islandicus* genome encodes only one B-type DNA polymerase (PolB1, Fig. S7) and one DNA polymerase of the Y family (PolY), generally

430 considered to be involved in the rescue of stalled replication forks and enhancement of cell survival upon DNA damage (Friedberg *et al.*, 2002). Recently, it has been demonstrated for the PolD-lacking Crenarchaeon *Sulfolobus acidocaldarius* that both its PolB1 and PolY have polymerase activities *in vitro* (Peng *et al.*, 2016). However, *Ca. N. islandicus* (like other AOA) does not encode the PolB1-binding proteins PBP1 and PBP2, which are required to form a multisubunit DNA polymerase

435 holoenzyme together with PolB in the Crenarchaeon *Sulfolobus solfataricus* P2 (Yan *et al.*, 2017). We hypothesize that *Ca. N. islandicus* may utilize one or both of the present polymerases for DNA replication, possibly in combination with its heterodimer PriSL, which has been demonstrated to function as a primase, a terminal transferase and a polymerase capable of polymerizing RNA or DNA chains of up to 7,000 nucleotides (Lao-Sirieix and Bell, 2004).

440 It is also interesting to note that the obligate thermophile *Ca. N. islandicus* like all genome-sequenced *Thaumarchaea* (Spang *et al.*, 2017) does not encode a reverse gyrase, which is widespread in hyperthermophilic microbes including other archaea of the TACK superphylum (Heine and Chandra, 2009; Makarova *et al.*, 2007; López-García *et al.*, 2015), but is not essential for growth under these conditions (Atomi *et al.*, 2004).

445 In conclusion, we have obtained a highly enriched (~ 85 %) culture of an obligately thermophilic AOA from a hot spring in Iceland. Despite the impressive diversity of AOA in high temperature environments as revealed by molecular tools (Zhang *et al.*, 2008; Wang *et al.*, 2009; Zhao *et al.*, 2011; Nishizawa *et al.*, 2013; Li *et al.*, 2015; Chen *et al.*, 2016), cultivation of only a single

obligately thermophilic AOA species – *Ca. Nitrosocaldus yellowstonensis* - was reported before (de la Torre *et al.*, 2008). The newly enriched AOA represents a new species of the genus *Nitrosocaldus* and was named *Ca. N. islandicus*. Comparative analysis of its closed genome revealed several surprising features like the absence of DNA polymerase D and the lack of canonical NO-generating enzymes, although physiological experiments with a NO-scavenger demonstrated NO-dependent ammonia-oxidation, as described for other AOA (Shen *et al.*, 2013; Jung *et al.*, 2014; Martens-Habben *et al.*, 2015; Sauder *et al.*, 2016). Furthermore, *Ca. N. islandicus* encodes the enzymatic repertoire for fermentation of aromatic amino acids that is, so far, unique among sequenced AOA. A pure culture of *Ca. N. islandicus* will be required to physiologically verify this genome-based hypothesis. Peptide or aromatic amino acid fermentation would enable an anaerobic lifestyle of *Ca. N. islandicus* and, if more widespread among *Thaumarchaea* not yet characterized (including mesophiles), might help explain their sometimes surprisingly high abundance in anaerobic ecosystems (Molina *et al.*, 2010; Bouskill *et al.*, 2012; Buckles *et al.*, 2013; Beam *et al.*, 2014; Lin *et al.*, 2015).

Based on the data presented here, we propose the following provisional taxonomic assignment for the novel *Thaumarchaeon* in our enrichment culture.

Nitrosocaldales order

Nitrosocaldaceae fam.

‘*Candidatus Nitrosocaldus islandicus*’ sp. nov.

**Etymology.** Nitrosus (Latin masculine adjective): nitrous; caldus (Latin masculine adjective): hot; islandicus (Latin masculine genitive name): from Iceland. The name alludes to the physiology of the organism (ammonia oxidizer, thermophilic) and the habitat from which it was recovered.

**Locality.** The biofilm of a terrestrial hot spring in Graendalur geothermal valley, Iceland (64° 1’7” N, 21° 11’20” W)

**Diagnosis.** An obligately thermophilic, aerobic chemolithoautotrophic ammonia oxidizer from the phylum *Thaumarchaea* growing as small irregular shaped cocci.

### Author contributions

AD, JV and CS cultivated and enriched the culture; AD, CS and PP performed growth and activity experiments; AD performed FISH and SEM analysis; CH, AD, PP, MA and RK performed bioinformatic analysis; JT kindly provided access to the *Ca. N. yellowstonensis* genome; AD, JV, CS, PP, MW and HD manually curated the annotation of the genome and interpreted the genome data; AD and MW wrote the manuscript with help from all co-authors.

### Conflict of interest statement

MA and RK own and run DNASense, the sequencing center at which the metagenomes were sequenced and the bins assembled. The authors declare no further conflict of interest.

### Acknowledgements

We thank Bjarni Sigurdson and the Agricultural University of Iceland for permission to access and sample in Graendalur valley, Iceland. Daniela Gruber from the Core Facility of Cell Imaging and Ultrastructure Research at the University of Vienna and Stefano Romano are gratefully acknowledged for help with sample preparation for electron microscopy. The authors are grateful to Anja Spang for fruitful discussions. JV, CS, CH, and MW were supported by the ERC Advanced Grant NITRICARE (294343) to MW. AD and HD were supported by the Austrian Science Fund (FWF) grants P25231-B21 and T938.

## References

- 500 Abell GCJ, Revill AT, Smith C, Bissett AP, Volkman JK, Robert SS. (2010). Archaeal ammonia oxidizers and nirS-type denitrifiers dominate sediment nitrifying and denitrifying populations in a subtropical macrotidal estuary. *ISME J* **4**: 286–300.
- Adair KL, Schwartz E. (2008). Evidence that ammonia-oxidizing archaea are more abundant than ammonia-oxidizing bacteria in semiarid soils of northern arizona, USA. *Microb Ecol* **56**: 420–426.
- 505 Adams MWW, Holden JF, Menon AL, Schut GJ, Grunden AM, Hou C, *et al.* (2001). Key role for sulfur in peptide metabolism and in regulation of three hydrogenases in the hyperthermophilic archaeon *Pyrococcus furiosus*. *J Bacteriol* **183**: 716–724.
- Almatawah QA, Cramp R, Cowan DA. (1999). Characterization of an inducible nitrilase from a thermophilic bacillus. *Extremophiles* **3**: 283–291.
- 510 Alvarez L, Bricio C, Blesa A, Hidalgo A, Berenguer J. (2014). Transferable denitrification capability of *Thermus thermophilus*. *Appl Environ Microbiol* **80**: 19–28.
- Amann RI, Binder BJ, Olson RJ, Chisholm SW, Devereux R, Stahl DA. (1990). Combination of 16S rRNA-targeted oligonucleotide probes with flow cytometry for analyzing mixed microbial populations. *Appl Environ Microbiol* **56**: 1919–1925.
- 515 Angel R, Conrad R. (2013). Elucidating the microbial resuscitation cascade in biological soil crusts following a simulated rain event. *Environ Microbiol* **15**: 2799–2815.
- Atomi H, Matsumi R, Imanaka T. (2004). Reverse gyrase is not a prerequisite for hyperthermophilic Life. *J Bacteriol* **186**: 4829–4833.
- Bartossek R, Nicol GW, Lanzen A, Klenk HP, Schleper C. (2010). Homologues of nitrite reductases in ammonia-oxidizing archaea: diversity and genomic context. *Environ Microbiol* **12**: 1075–1088.
- 520 Bayer B, Vojvoda J, Offre P, Alves RJE, Elisabeth NH, Garcia JA, *et al.* (2016). Physiological and genomic characterization of two novel marine *thaumarchaeal* strains indicates niche differentiation. *ISME J* **10**: 1051–1063.
- Beam JP, Jay ZJ, Kozubal MA, Inskeep WP. (2014). Niche specialization of novel *Thaumarchaeota* to oxic and hypoxic acidic geothermal springs of Yellowstone National Park. *ISME J* **8**: 938–951.
- Beam JP. (2015). Geobiological interactions of archaeal populations in acidic and alkaline geothermal springs of Yellowstone National Park, WY, USA. Montana State University, ProQuest Dissertations Publishing, 3708756.
- Berg C, Listmann L, Vandieken V, Vogts A, Jürgens K. (2015). Chemoautotrophic growth of ammonia-oxidizing *Thaumarchaeota* enriched from a pelagic redox gradient in the Baltic Sea. *Front Microbiol* **5**. e-pub ahead of print, doi: 10.3389/fmicb.2014.00786.
- Berney M, Greening C, Conrad R, Jacobs WR, Cook GM. (2014). An obligately aerobic soil bacterium activates fermentative hydrogen production to survive reductive stress during hypoxia. *Proc Natl Acad Sci* **111**: 11479–11484.



- Bouskill NJ, Eveillard D, Chien D, Jayakumar A, Ward BB. (2012). Environmental factors determining ammonia-oxidizing organism distribution and diversity in marine environments. *Environ Microbiol* **14**: 714–729.
- Brochier-Armanet C, Boussau B, Gribaldo S, Forterre P. (2008). Mesophilic *Crenarchaeota*: proposal for a third archaeal phylum, the *Thaumarchaeota*. *Nat Rev Micro* **6**: 245–252.
- Brochier-Armanet C, Gribaldo S, Forterre P. (2012). Spotlight on the *Thaumarchaeota*. *ISME J* **6**: 227–230.
- Bryant FO, Adams MW. (1989). Characterization of hydrogenase from the hyperthermophilic archaeobacterium *Pyrococcus furiosus*. *J Biol Chem* **264**: 5070–5079.
- Buckel W, Thauer RK. (2013). Energy conservation via electron bifurcating ferredoxin reduction and proton/Na<sup>+</sup> translocating ferredoxin oxidation. *Biochim Biophys Acta BBA - Bioenerg* **1827**: 94–113.
- Buckles LK, Villanueva L, Weijers JWH, Verschuren D, Damsté JSS. (2013). Linking isoprenoidal GDGT membrane lipid distributions with gene abundances of ammonia-oxidizing *Thaumarchaeota* and uncultured *crenarchaeotal* groups in the water column of a tropical lake (Lake Challa, East Africa). *Environ Microbiol* **15**: 2445–2462.
- Cann IKO, Komori K, Toh H, Kanai S, Ishino Y. (1998). A heterodimeric DNA polymerase: Evidence that members of *Euryarchaeota* possess a distinct DNA polymerase. *Proc Natl Acad Sci* **95**: 14250–14255.
- Caranto JD, Lancaster KM. (2017). Nitric oxide is an obligate bacterial nitrification intermediate produced by hydroxylamine oxidoreductase. *Proc Natl Acad Sci* **114**: 8217–8222.
- Chen S, Peng X, Xu H, Ta K. (2016). Nitrification of archaeal ammonia oxidizers in a high-temperature hot spring. *Biogeosciences* **13**: 2051–2060.
- Cramp R, Gilmour M, Cowan DA. (1997). Novel thermophilic bacteria producing nitrile-degrading enzymes. *Microbiology* **143**: 2313–2320.
- Čuboňová L, Richardson T, Burkhart BW, Kelman Z, Connolly BA, Reeve JN, *et al.* (2013). Archaeal DNA polymerase D but not DNA polymerase B is required for genome replication in *Thermococcus kodakarensis*. *J Bacteriol* **195**: 2322–2328.
- Daebeler A, Abell GCJ, Bodelier PLE, Bodrossy L, Frampton DMF, Hefting MM, *et al.* (2012). Archaeal dominated ammonia-oxidizing communities in Icelandic grassland soils are moderately affected by long-term N fertilization and geothermal heating. *Front Microbiol* **3**. e-pub ahead of print, doi: 10.3389/fmicb.2012.00352.
- Daims H, Brühl A, Amann R, Schleifer K-H, Wagner M. (1999). The domain-specific probe EUB338 is insufficient for the detection of all bacteria: Development and evaluation of a more comprehensive probe Set. *Syst Appl Microbiol* **22**: 434–444.
- Daims H, Stoecker K, Wagner M. (2005). Fluorescence in situ hybridisation for the detection of prokaryotes. In: Osborn AM, Smith CJ (eds). *Molecular Microbial Ecology*. Taylor & Francis: Abington, U.K., pp 213–239.

- Demple B, Harrison L. (1994). Repair of oxidative damage to DNA: Enzymology and biology. *Annu Rev Biochem* **63**: 915–948.
- Dodsworth JA, Hungate BA, Hedlund BP. (2011). Ammonia oxidation, denitrification and dissimilatory nitrate reduction to ammonium in two US Great Basin hot springs with abundant ammonia-oxidizing archaea. *Environ Microbiol* **13**: 2371–2386.
- Edgar RC. (2010). Search and clustering orders of magnitude faster than BLAST. *Bioinformatics* **26**: 2460–2461.
- Erguder TH, Nico B, Lieven W, Massimo M, Willy V. (2009). Environmental factors shaping the ecological niches of ammonia-oxidizing archaea. *FEMS Microbiol Rev* **33**: 855–869.
- Francis CA, Roberts KJ, Beman JM, Santoro AE, Oakley BB. (2005). Ubiquity and diversity of ammonia-oxidizing archaea in water columns and sediments of the ocean. *Proc Natl Acad Sci U S A* **102**: 14683–14688.
- Francis CA, Beman JM, Kuypers MMM. (2007). New processes and players in the nitrogen cycle: The microbial ecology of anaerobic and archaeal ammonia oxidation. *ISME J* **1**: 19–27.
- Friedberg EC, Wagner R, Radman M. (2002). Specialized DNA polymerases, cellular survival, and the genesis of mutations. *Science* **296**: 1627–1630.
- Gelfand DH, Steinberg RA. (1977). *Escherichia coli* mutants deficient in the aspartate and aromatic amino acid aminotransferases. *J Bacteriol* **130**: 429–440.
- Gibson M, Chen P-T, Drennan CL. (2016). A structural phylogeny for understanding 2-oxoacid oxidoreductase function. *Curr Opin Struct Biol* **41**: 54–61.
- Glasemacher J, Bock A-K, Schmid R, Schönheit P. (1997). Purification and properties of acetyl-CoA synthetase (ADP-forming), an archaeal enzyme of acetate formation and ATP Synthesis, from the hyperthermophile *Pyrococcus furiosus*. *Eur J Biochem* **244**: 561–567.
- Groussin M, Gouy M. (2011). Adaptation to environmental temperature is a major determinant of molecular evolutionary rates in Archaea. *Mol Biol Evol* **28**: 2661–2674.
- Guy L, Ettema TJG. (2011). The archaeal ‘TACK’ superphylum and the origin of eukaryotes. *Trends Microbiol* **19**: 580–587.
- Haas BJ, Sandigursky M, Tainer JA, Franklin WA, Cunningham RP. (1999). Purification and characterization of *Thermotoga maritima* endonuclease IV, a thermostable apurinic/ apyrimidinic endonuclease and 3'-repair diesterase. *J Bacteriol* **181**: 2834–2839.
- Hallam SJ, Konstantinidis KT, Putnam N, Schleper C, Watanabe Y, Sugahara J, *et al.* (2006). Genomic analysis of the uncultivated marine crenarchaeote *Cenarchaeum symbiosum*. *Proc Natl Acad Sci* **103**: 18296–18301.
- Hatzenpichler R, Lebedeva EV, Spieck E, Stoecker K, Richter A, Daims H, *et al.* (2008). A moderately thermophilic ammonia-oxidizing crenarchaeote from a hot spring. *Proc Natl Acad Sci* **105**: 2134–2139.

- Heine M, Chandra SBC. (2009). The linkage between reverse gyrase and hyperthermophiles: A review of their invariable association. *J Microbiol* **47**: 229.
- Herbold CW, Lehtovirta-Morley LE, Jung M-Y, Jehmlich N, Hausmann B, Han P, *et al.* (2017). Ammonia-oxidising archaea living at low pH: Insights from comparative genomics. *Environ Microbiol*, in press.
- Hyatt D, Chen G-L, Locascio PF, Land ML, Larimer FW, Hauser LJ. (2010). Prodigal: prokaryotic gene recognition and translation initiation site identification. *BMC Bioinformatics* **11**: 119.
- Ishino, Yoshizumi and Ishino, Sonoko (2013). DNA Replication in Archaea, the Third Domain of Life. In: Stuart, David (ed) The Mechanisms of DNA Replication; *InTech*, DOI: 10.5772/53986.
- Isidorov V, Zenkevich I, Karpov G. (1992). Volatile organic compounds in steam-gas outflows of several volcanoes and hydrothermal systems in Kamchatka. *J Volc Seis* **13**: 287–293.
- Jiang HC, Huang QY, Dong HL, Wang P, Wang FP, Li WJ, *et al.* (2010). RNA-based investigation of ammonia-oxidizing archaea in hot springs of Yunnan Province, China. *Appl Environ Microbiol* **76**: 4538–4541.
- Jung M-Y, Kim J-G, Sinninghe Damsté JS, Rijpstra WIC, Madsen EL, Kim S-J, *et al.* (2016). A hydrophobic ammonia-oxidizing archaeon of the *Nitrosocosmicus* clade isolated from coal tar-contaminated sediment. *Environ Microbiol Rep* **8**: 983–992.
- Jung M-Y, Park S-J, Kim S-J, Kim J-G, Damsté JSS, Jeon CO, *et al.* (2014). A Mesophilic, autotrophic, ammonia-oxidizing archaeon of *thaumarchaeal* Group I.1a cultivated from a deep oligotrophic soil horizon. *Appl Environ Microbiol* **80**: 3645–3655.
- Jung MY, Park S-J, Min D, Kim J-S, Rijpstra WIC, Sinninghe Damsté JS, *et al.* (2011). Enrichment and characterization of an autotrophic ammonia-oxidizing archaeon of mesophilic crenarchaeal Group I.1a from an agricultural soil. *Appl Environ Microbiol* **77**: 8635–8647.
- Kabaivanova L, Dimitrov P, Boyadzhieva I, Engibarov S, Dobрева E, Emanuilova E. (2008). Nitrile degradation by free and immobilized cells of the thermophile *Bacillus* sp. UG-5B, isolated from polluted industrial waters. *World J Microbiol Biotechnol* **24**: 2383–2388.
- Käll L, Krogh A, Sonnhammer ELL. (2007). Advantages of combined transmembrane topology and signal peptide prediction—the Phobius web server. *Nucleic Acids Res* **35**: W429–W432.
- Kandeler E, Gerber H. (1988). Short-term assay of soil urease activity using colorimetric determination of ammonium. *Biol Fertil Soils* **6**: 68–72.
- Katoh K, Standley DM. (2013). MAFFT Multiple sequence alignment software version 7: Improvements in performance and usability. *Mol Biol Evol* **30**: 772–780.
- Kelley LA, Mezulis S, Yates CM, Wass MN, Sternberg MJE. (2015). The Phyre2 web portal for protein modeling, prediction and analysis. *Nat Protoc* **10**: 845–858.
- Kerou M, Offre P, Valledor L, Abby SS, Melcher M, Nagler M, *et al.* (2016). Proteomics and comparative genomics of *Nitrososphaera viennensis* reveal the core genome and adaptations of archaeal ammonia oxidizers. *Proc Natl Acad Sci* **113**: E7937–E7946.

- Koch H, Lückner S, Albertsen M, Kitzinger K, Herbold C, Spieck E, *et al.* (2015). Expanded metabolic versatility of ubiquitous nitrite-oxidizing bacteria from the genus *Nitrospira*. *Proc Natl Acad Sci* **112**: 11371–11376.
- Könneke M, Bernhard AE, de la Torre JR, Walker CB, Waterbury JB, Stahl DA. (2005). Isolation of an autotrophic ammonia-oxidizing marine archaeon. *Nature* **437**: 543–546.
- Könneke M, Schubert DM, Brown PC, Hügler M, Standfest S, Schwander T, *et al.* (2014). Ammonia-oxidizing archaea use the most energy-efficient aerobic pathway for CO<sub>2</sub> fixation. *Proc Natl Acad Sci* **111**: 8239–8244.
- Konstantinidis KT, Tiedje JM. (2005). Towards a genome-based taxonomy for prokaryotes. *J Bacteriol* **187**: 6258–6264.
- Kostan J, Sjöblom B, Maixner F, Mlynek G, Furtmüller PG, Obinger C, *et al.* (2010). Structural and functional characterisation of the chlorite dismutase from the nitrite-oxidizing bacterium “*Candidatus Nitrospira defluvii*”: Identification of a catalytically important amino acid residue. *J Struct Biol* **172**: 331–342.
- Kozłowski JA, Stieglmeier M, Schleper C, Klotz MG, Stein LY. (2016). Pathways and key intermediates required for obligate aerobic ammonia-dependent chemolithotrophy in bacteria and *Thaumarchaeota*. *ISME J* **10**: 1836–1845.
- Kwan P, McIntosh CL, Jennings DP, Hopkins RC, Chandrayan SK, Wu C-H, *et al.* (2015). The [NiFe]-hydrogenase of *Pyrococcus furiosus* exhibits a new type of oxygen tolerance. *J Am Chem Soc* **137**: 13556–13565.
- Lagkouvardos I, Joseph D, Kapfhammer M, Giritli S, Horn M, Haller D, *et al.* (2016). IMNGS: A comprehensive open resource of processed 16S rRNA microbial profiles for ecology and diversity studies. *Sci Rep* **6**: 33721.
- Lao-Sirieix S, Bell SD. (2004). The heterodimeric primase of the hyperthermophilic archaeon *Sulfolobus solfataricus* possesses DNA and RNA primase, polymerase and 3'-terminal nucleotidyl transferase activities. *J Mol Biol* **344**: 1251–1263.
- Lartillot N, Lepage T, Blanquart S. (2009). PhyloBayes 3: a Bayesian software package for phylogenetic reconstruction and molecular dating. *Bioinforma Oxf Engl* **25**: 2286–2288.
- Lebedeva EV, Alawi M, Maixner F, Jozsa P-G, Daims H, Spieck E. (2008). Physiological and phylogenetic characterization of a novel lithoautotrophic nitrite-oxidizing bacterium, ‘*Candidatus Nitrospira bockiana*’. *Int J Syst Evol Microbiol* **58**: 242–250.
- Lebedeva EV, Hatzenpichler R, Pelletier E, Schuster N, Hauzmayer S, Bulaev A, *et al.* (2013). Enrichment and genome sequence of the group I. 1a ammonia-oxidizing archaeon ‘*Ca. Nitrosotenuis uzonensis*’ representing a clade globally distributed in thermal habitats. *Plos One* **8**. e-pub ahead of print, doi: 10.1371/journal.pone.0080835.
- Lehtovirta-Morley LE, Sayavedra-Soto LA, Gallois N, Schouten S, Stein LY, Prosser JI, *et al.* (2016). Identifying potential mechanisms enabling acidophily in the ammonia-oxidising archaeon ‘*Candidatus Nitrosotalea devanaterre*’. *Appl Environ Microbiol* **82**: 2608-2619.



- Leininger S, Urich T, Schloter M, Schwark L, Qi J, Nicol GW, *et al.* (2006). Archaea predominate among ammonia-oxidizing prokaryotes in soils. *Nature* **442**: 806–809.
- Li H. (2016). Minimap and miniMap: fast mapping and de novo assembly for noisy long sequences. *Bioinformatics* **32**: 2103–2110.
- Li H, Yang Q, Li J, Gao H, Li P, Zhou H. (2015). The impact of temperature on microbial diversity and AOA activity in the Tengchong geothermal field, China. *Sci Rep* **5**: 17056.
- Lin X, Handley KM, Gilbert JA, Kostka JE. (2015). Metabolic potential of fatty acid oxidation and anaerobic respiration by abundant members of *Thaumarchaeota* and *Thermoplasmata* in deep anoxic peat. *ISME J* **9**: 2740–2744.
- López-García P, Zivanovic Y, Deschamps P, Moreira D. (2015). Bacterial gene import and mesophilic adaptation in archaea. *Nat Rev Microbiol* **13**: 447–456.
- Ludwig W, Strunk O, Westram R, Richter L, Meier H, Yadhukumar, *et al.* (2004). ARB: a software environment for sequence data. *Nucl Acids Res* **32**: 1363–1371.
- Ma K, Schicho RN, Kelly RM, Adams MW. (1993). Hydrogenase of the hyperthermophile *Pyrococcus furiosus* is an elemental sulfur reductase or sulfhydrogenase: Evidence for a sulfur-reducing hydrogenase ancestor. *Proc Natl Acad Sci U S A* **90**: 5341–5344.
- Mai X, Adams MW. (1994). Indolepyruvate ferredoxin oxidoreductase from the hyperthermophilic archaeon *Pyrococcus furiosus*. A new enzyme involved in peptide fermentation. *J Biol Chem* **269**: 16726–16732.
- Maixner F, Wagner M, Lückner S, Pelletier E, Schmitz-Esser S, Hace K, *et al.* (2008). Environmental genomics reveals a functional chlorite dismutase in the nitrite-oxidizing bacterium ‘*Candidatus Nitrospira defluvii*’. *Environ Microbiol* **10**: 3043–3056.
- Makarova KS, Krupovic M, Koonin EV. (2014). Evolution of replicative DNA polymerases in archaea and their contributions to the eukaryotic replication machinery. *Front Microbiol* **5**, doi: 10.3389/fmicb.2014.00354.
- Makarova KS, Sorokin AV, Novichkov PS, Wolf YI, Koonin EV. (2007). Clusters of orthologous genes for 41 archaeal genomes and implications for evolutionary genomics of archaea. *Biol Direct* **2**: 33.
- Martens-Habbena W, Qin W, Horak REA, Urakawa H, Schauer AJ, Moffett JW, *et al.* (2015). The production of nitric oxide by marine ammonia-oxidizing archaea and inhibition of archaeal ammonia oxidation by a nitric oxide scavenger. *Environ Microbiol* **17**: 2261–2274.
- Martens-Habbena W, Berube PM, Urakawa H, de la Torre JR, Stahl DA. (2009). Ammonia oxidation kinetics determine niche separation of nitrifying archaea and bacteria. *Nature* **461**: 976–979.
- Miller SL, Urey HC. (1959). Organic compound synthesis on the primitive earth. *Science* **130**: 245–251.

- Mincer TJ, Church MJ, Taylor LT, Preston C, Kar DM, DeLong EF. (2007). Quantitative distribution of presumptive archaeal and bacterial nitrifiers in Monterey Bay and the North Pacific Subtropical Gyre. *Environ Microbiol* **9**: 1162–1175.
- Miranda KM, Espey MG, Wink DA. (2001). A rapid, simple spectrophotometric method for simultaneous detection of nitrate and nitrite. *Nitric Oxide* **5**: 62–71.
- Miyakawa S, Cleaves HJ, Miller SL. (2002). The cold origin of life: Implications based on the hydrolytic stabilities of hydrogen, cyanide and formamide. *Orig Life Evol Biosph* **32**: 195–208.
- Molina V, Belmar L, Ulloa O. (2010). High diversity of ammonia-oxidizing archaea in permanent and seasonal oxygen-deficient waters of the eastern South Pacific. *Environ Microbiol* **12**: 2450–2465.
- Musmann M, Brito I, Pitcher A, Damste JSS, Hatzenpichler R, Richter A, *et al.* (2011). *Thaumarchaeotes* abundant in refinery nitrifying sludges express *amoA* but are not obligate autotrophic ammonia oxidizers. *Proc Natl Acad Sci U S A* **108**: 16771–16776.
- Nishizawa M, Koba K, Makabe A, Yoshida N, Kaneko M, Hirao S, *et al.* (2013). Nitrification-driven forms of nitrogen metabolism in microbial mat communities thriving along an ammonium-enriched subsurface geothermal stream. *Geochim Cosmochim Acta* **113**: 152–173.
- Niu L, Zhang X, Li Y, Wang P, Zhang W, Wang C, *et al.* (2017). Elevational characteristics of the archaeal community in full-scale activated sludge wastewater treatment plants at a 3660-meter elevational scale. *Water Sci Technol* wst2017215.
- Otte J, Mall A, Schubert DM, Könneke M, Berg IA. (2015). Malonic semialdehyde reductase from the archaeon *Nitrosopumilus maritimus* is involved in the autotrophic 3-hydroxypropionate/4-hydroxybutyrate cycle. *Appl Environ Microbiol* **81**: 1700–1707.
- Ozawa Y, Siddiqui MA, Takahashi Y, Urushiyama A, Ohmori D, Yamakura F, *et al.* (2012). Indolepyruvate ferredoxin oxidoreductase: An oxygen-sensitive iron–sulfur enzyme from the hyperthermophilic archaeon *Thermococcus profundus*. *J Biosci Bioeng* **114**: 23–27.
- Pace HC, Brenner C. (2001). The nitrilase superfamily: classification, structure and function. *Genome Biol* **2**: reviews0001.1–reviews0001.9.
- Palatinszky M, Herbold C, Jehmlich N, Pogoda M, Han P, von Bergen M, *et al.* (2015). Cyanate as an energy source for nitrifiers. *Nature* **524**: 105–108.
- Park S-J, Ghai R, Martín-Cuadrado A-B, Rodríguez-Valera F, Chung W-H, Kwon K, *et al.* (2014). Genomes of two new ammonia-oxidizing archaea enriched from deep marine sediments. *PLoS ONE* **9**: e96449.
- Parks DH, Imelfort M, Skennerton CT, Hugenholtz P, Tyson GW. (2015). CheckM: assessing the quality of microbial genomes recovered from isolates, single cells, and metagenomes. *Genome Res* **25**: 1043–1055.
- Peng L, Xia X, Liu X. (2016). Biochemical characterization of translesion synthesis by *Sulfolobus acidocaldarius* DNA polymerases. *Chem Res Chin Univ* **32**: 226–233.

- Pjevac P, Schauburger C, Poghosyan L, Herbold CW, van Kessel MAHJ, Daebeler A, *et al.* (2017). *AmoA*-targeted polymerase chain reaction primers for the specific detection and quantification of Comammox *Nitrospira* in the environment. *Front Microbiol* **8**. doi: 10.3389/fmicb.2017.01508.
- Price MN, Dehal PS, Arkin AP. (2010). FastTree 2 – Approximately maximum-likelihood trees for large alignments. *PLoS ONE* **5**: e9490.
- Prosser JI, Nicol GW. (2012). Archaeal and bacterial ammonia-oxidisers in soil: the quest for niche specialisation and differentiation. *Trends Microbiol* **20**: 523–531.
- Qin Q-L, Xie B-B, Zhang X-Y, Chen X-L, Zhou B-C, Zhou J, *et al.* (2014). A proposed genus boundary for the prokaryotes based on genomic insights. *J Bacteriol* **196**: 2210–2215.
- Qin W, Heal KR, Ramdasi R, Kobelt JN, Martens-Habbena W, Bertagnolli AD, *et al.* (2017a). *Nitrosopumilus maritimus* gen. nov., sp. nov., *Nitrosopumilus cobalaminigenes* sp. nov., *Nitrosopumilus oxyclinae* sp. nov., and *Nitrosopumilus ureiphilus* sp. nov., four marine ammonia-oxidizing archaea of the phylum *Thaumarchaeota*. *Int J Syst Evol Microbiol*. e-pub ahead of print, doi: 10.1099/ijsem.0.002416.
- Qin W, Jewell TNM, Russell VV, Hedlund BP, de la Torre JR, Stahl DA. (2017b). *Candidatus Nitrosocaldus*. In: *Bergey's Manual of Systematics of Archaea and Bacteria*. John Wiley & Sons, Ltd. e-pub ahead of print, doi: 10.1002/9781118960608.gbm01287.
- Reigstad LJ, Richter A, Daims H, Urich T, Schwark L, Schleper C. (2008). Nitrification in terrestrial hot springs of Iceland and Kamchatka. *FEMS Microbiol Ecol* **64**: 167–174.
- Sauder LA, Albertsen M, Engel K, Schwarz J, Nielsen PH, Wagner M, *et al.* (2017). Cultivation and characterization of *Candidatus Nitrosocosmicus exaquare*, an ammonia-oxidizing archaeon from a municipal wastewater treatment system. *ISME J* **11**: 1142–1157.
- Saw JH, Spang A, Zaremba-Niedzwiedzka K, Juzokaite L, Dodsworth JA, Murugapiran SK, *et al.* (2015). Exploring microbial dark matter to resolve the deep archaeal ancestry of eukaryotes. *Phil Trans R Soc B* **370**: 20140328.
- Schleper C, Nicol GW. (2010). Ammonia-oxidizing archaea - physiology, ecology, evolution. In: Poole RK (ed) Vol. 57. *Adv in Microb physiol*. Elsevier Ltd.: London.
- Schulte M, Shock E. (1995). Thermodynamics of strecker synthesis in hydrothermal systems. *Orig Life Evol Biosph* **25**: 161–173.
- Shen T, Stieglmeier M, Dai J, Urich T, Schleper C. (2013). Responses of the terrestrial ammonia oxidizing archaeon *Ca. Nitrososphaera viennensis* and the ammonia oxidizing bacterium *Nitrospira multiformis* to nitrification inhibitors. *FEMS Microbiol Lett* **344**: 121–129.
- Spang A, Caceres EF, Ettema TJG. (2017). Genomic exploration of the diversity, ecology, and evolution of the archaeal domain of life. *Science* **357**: eaaf3883.
- Spang A, Poehlein A, Offre P, Zumbragel S, Haider S, Rychlik N, *et al.* (2012). The genome of the ammonia-oxidizing *Candidatus Nitrososphaera gargensis*: insights into metabolic versatility and environmental adaptations. *Environ Microbiol* **14**: 3122–3145.

- Stahl DA, Amann R. (1991). Development and application of nucleic acid probes in bacterial systematics. In: Stackebrandt E, Goodfellow M (eds). *Nucleic Acid Techniques in Bacterial Systematics*. Chichester, England: John Wiley & Sons Ltd., pp 205–248.
- Stahl DA, de la Torre JR. (2012). Physiology and diversity of ammonia-oxidizing archaea. In: Gottesman S, Harwood CS, Schneewind O (eds) *Annual Review of Microbiology Vol. 66. Annual Review of Microbiology, Vol 66*. pp 83–101.
- Stetter KO. (1998). Hyperthermophiles: isolation, classification, and properties. In: Horikoshi K, Grant WD (eds). *Extremophiles: microbial life in extreme environments*. Wiley-Liss: New York, N.Y., pp 1–24.
- Stieglmeier M, Alves RJE, Schleper C. (2014a). The phylum *Thaumarchaeota*. In: Rosenberg E, DeLong EF, Lory S, Stackebrandt E, Thompson F (eds). *The Prokaryotes*. Springer Berlin Heidelberg, pp 347–362.
- Stieglmeier M, Klingl A, Alves RJE, Rittmann SK-MR, Melcher M, Leisch N, *et al.* (2014b). *Nitrososphaera viennensis* sp. nov., an aerobic and mesophilic ammonia-oxidizing archaeon from soil and member of the archaeal phylum *Thaumarchaeota*. *Int J Syst Evol Microbiol* **64**: 2738–2752.
- Suchard MA, Redelings BD. (2006). BALi-Phy: simultaneous Bayesian inference of alignment and phylogeny. *Bioinformatics* **22**: 2047–2048.
- de la Torre JR de la, Christopher BW, Anitra EI, Martin K, David AS. (2008). Cultivation of a thermophilic ammonia oxidizing archaeon synthesizing crenarchaeol. *Environ Microbiol* **10**: 810–818.
- Tourna M, Freitag TE, Nicol GW, Prosser JI. (2008). Growth, activity and temperature responses of ammonia-oxidizing archaea and bacteria in soil microcosms. *Environ Microbiol* **10**: 1357–1364.
- Vallenet D, Belda E, Calteau A, Cruveiller S, Engelen S, Lajus A, *et al.* (2013). MicroScope—an integrated microbial resource for the curation and comparative analysis of genomic and metabolic data. *Nucleic Acids Res* **41**: D636–D647.
- Varghese NJ, Mukherjee S, Ivanova N, Konstantinidis KT, Mavrommatis K, Kyrpides NC, *et al.* (2015). Microbial species delineation using whole genome sequences. *Nucleic Acids Res* **43**: 6761–6771.
- Vaser R, Sović I, Nagarajan N, Šikić M. (2017). Fast and accurate de novo genome assembly from long uncorrected reads. *Genome Res.* e-pub ahead of print, doi: 10.1101/gr.214270.116.
- Walker CB, Torre JR de la, Klotz MG, Urakawa H, Pinel N, Arp DJ, *et al.* (2010). *Nitrosopumilus maritimus* genome reveals unique mechanisms for nitrification and autotrophy in globally distributed marine crenarchaea. *Proc Natl Acad Sci U S A* **107**: 8818–8823.
- Wallner G, Amann R, Beisker W. (1993). Optimizing fluorescent in situ hybridization with rRNA-targeted oligonucleotide probes for flow cytometric identification of microorganisms. *Cytometry* **14**: 136–143.
- Wang S, Xiao X, Jiang L, Peng X, Zhou H, Meng J, *et al.* (2009). Diversity and abundance of ammonia-oxidizing archaea in hydrothermal vent chimneys of the Juan de Fuca Ridge. *Appl Environ Microbiol* **75**: 4216–4220.



- Weidler GW, Dornmayr-Pfaffenhuemer M, Gerbl FW, Heinen W, Stan-Lotter H. (2007). Communities of archaea and bacteria in a subsurface radioactive thermal spring in the Austrian central Alps, and evidence of ammonia-oxidizing *Crenarchaeota*. *Appl Environ Microbiol* **73**: 259–270.
- Wick RR, Judd LM, Gorrie CL, Holt KE. (2017). Unicycler: Resolving bacterial genome assemblies from short and long sequencing reads. *PLOS Comput Biol* **13**: e1005595.
- Williams TA, Szöllösi GJ, Spang A, Foster PG, Heaps SE, Boussau B, *et al.* (2017). Integrative modeling of gene and genome evolution roots the archaeal tree of life. *Proc Natl Acad Sci* **114**: E4602–E4611.
- Yan J, Beattie TR, Rojas AL, Schermerhorn K, Gristwood T, Trinidad JC, *et al.* (2017). Identification and characterization of a heterotrimeric archaeal DNA polymerase holoenzyme. *Nat Commun* **8**: 15075.
- Zeglin LH, Taylor AE, Myrold DD, Bottomley PJ. (2011). Bacterial and archaeal *amoA* gene distribution covaries with soil nitrification properties across a range of land uses. *Environ Microbiol Rep* **3**: 717–726.
- Zhalnina KV, Dias R, Leonard MT, Dorr de Quadros P, Camargo FAO, Drew JC, *et al.* (2014). Genome sequence of *Candidatus Nitrososphaera evergladensis* from group I.1b enriched from Everglades soil reveals novel genomic features of the ammonia-oxidizing archaea. *PLoS ONE* **9**: e101648.
- Zhang CL, Ye Q, Huang Z, Li W, Chen J, Song Z, *et al.* (2008). Global occurrence of archaeal *amoA* genes in terrestrial hot springs. *Appl Environ Microbiol* **74**: 6417–6426.
- Zhao W, Song Z, Jiang H, Li W, Mou X, Romanek CS, *et al.* (2011). Ammonia-oxidizing archaea in Kamchatka hot springs. *Geomicrobiol J* **28**: 149–159.
- Zhang Y, Tian Z, Liu M, Shi ZJ, Hale L, Zhou J, *et al.* (2015). High concentrations of the antibiotic spiramycin in wastewater lead to high abundance of ammonia-oxidizing archaea in nitrifying populations. *Environ Sci Technol* **49**: 9124–9132.
- Zhou J, Bruns MA, Tiedje JM. (1996). DNA recovery from soils of diverse composition. *Appl Environ Microbiol* **62**: 316–322.
- Zorraquino MA, Althaus RL, Roca M, Molina MP. (2011). Heat treatment effects on the antimicrobial activity of macrolide and lincosamide antibiotics in milk. *J Food Prot* **74**: 311–315.

525

530



## Tables and figures

**Table 1. Genome features and growth rates of *Ca. N. islandicus* and of selected reference AOA**

| Genome features                                       | <i>Ca. N. islandicus</i> 3F | <i>N. gargensis</i> Ga9-2 | <i>N. viennensis</i> EN76 | <i>Ca. N. exaquare</i> G61 | <i>N. devanaterre</i> Nd1 | <i>Ca. N. uzonensis</i> N4 | <i>N. maritimus</i> SCM1 |
|-------------------------------------------------------|-----------------------------|---------------------------|---------------------------|----------------------------|---------------------------|----------------------------|--------------------------|
| Genome size [Mb]                                      | 1.62                        | 2.83                      | 2.53                      | 2.99                       | 1.81                      | 1.65                       | 1.60                     |
| Number of scaffolds                                   | 1                           | 1                         | 1                         | 1                          | 1                         | 1                          | 1                        |
| Number of contigs                                     | 1                           | 1                         | 1                         | 1                          | 1                         | 14                         | 1                        |
| Average G+C content [%]                               | 41.54                       | 48.35                     | 52.72                     | 33.94                      | 37.07                     | 42.25                      | 34.17                    |
| Protein coding density [%]                            | 87.85                       | 83.37                     | 86.43                     | 77.14                      | 90.55                     | 90.42                      | 91.65                    |
| Number of genomic objects (CDS, fragment CDS, r/tRNA) | 1851                        | 4037                      | 3266                      | 3394                       | 2145                      | 2001                       | 2012                     |
| Number of coding sequences (CDS)                      | 1824                        | 3999                      | 3277                      | 3358                       | 2106                      | 1960                       | 1969                     |
| Motility/ chemotaxis                                  | +                           | +                         | +                         | -                          | +                         | +                          | -                        |
| Carbon fixation                                       | 3HP/4HB                     | 3HP/4HB                   | 3HP/4HB                   | 3HP/4HB                    | 3HP/4HB                   | 3HP/4HB                    | 3HP/4HB                  |
| Ammonium transporters                                 | 3                           | 3                         | 3                         | 1                          | 3                         | 2                          | 2                        |
| NirK                                                  | 0                           | 1                         | 1                         | 1                          | 1                         | 1                          | 1                        |
| MCO1 + ZIP/ MCO1 <sup>a</sup>                         | 1/ 0                        | 1/ 1                      | 2/ 0                      | 1/ 1                       | 0/ 0                      | 1/ 0                       | 2/ 0                     |
| Urease and urea transport                             | +                           | +                         | +                         | +                          | -                         | -                          | -                        |
| Cyanate lyase                                         | -                           | +                         | -                         | -                          | -                         | -                          | -                        |
| Nitrilase/ Cyanide hydratase                          | 1                           | 0                         | 0                         | 0                          | 0                         | 1                          | 1                        |
| Aromatic amino acid fermentation                      | +                           | -                         | -                         | -                          | -                         | -                          | -                        |
| Hydrogenase                                           | 3b                          | -                         | 4a                        | -                          | 4a                        | -                          | -                        |
| Coenzyme F420                                         | +                           | +                         | +                         | +                          | +                         | +                          | +                        |
| Vitamin B12                                           | +                           | +                         | +                         | +                          | +                         | +                          | +                        |
| Catalase                                              | 0                           | (1) <sup>b</sup>          | 0                         | 1                          | 0                         | 0                          | 0                        |
| Peroxidase                                            | 0                           | 0                         | 0                         | 1                          | 0                         | 0                          | 0                        |
| Superoxide dismutase                                  | 1                           | 1                         | 1                         | 1                          | 1                         | 1                          | 2                        |
| Chlorite dismutase-like enzyme <sup>c</sup>           | 1                           | 1                         | 1                         | 1                          | 1                         | 1                          | 1                        |
| DNA polymerases                                       | B1, Y                       | B1, D, Y                  | B1, D, Y                  | B1, D, Y                   | B1, D, Y                  | B1, D, Y                   | B1, D, Y                 |
| Generation time [d]                                   | 2.32 ± 0.24 <sup>d</sup>    | NA                        | 1.25 ± 0.03               | NA                         | NA                        | NA                         | 0.88 – 1.08              |

a, MCO1+ZIP/ MCO1, multicopper oxidase 1 (as defined in Kerou et al., 2016) with adjacent zinc permease/ multicopper oxidase 1 without an adjacent zinc permease; b, The gene is truncated; c, chlorite dismutases are of interest in other nitrifiers (Maixner et al., 2008; Kostan et al., 2010), but it is not known what their function is in archaea; d, determined at 65 °C; NA, not available.

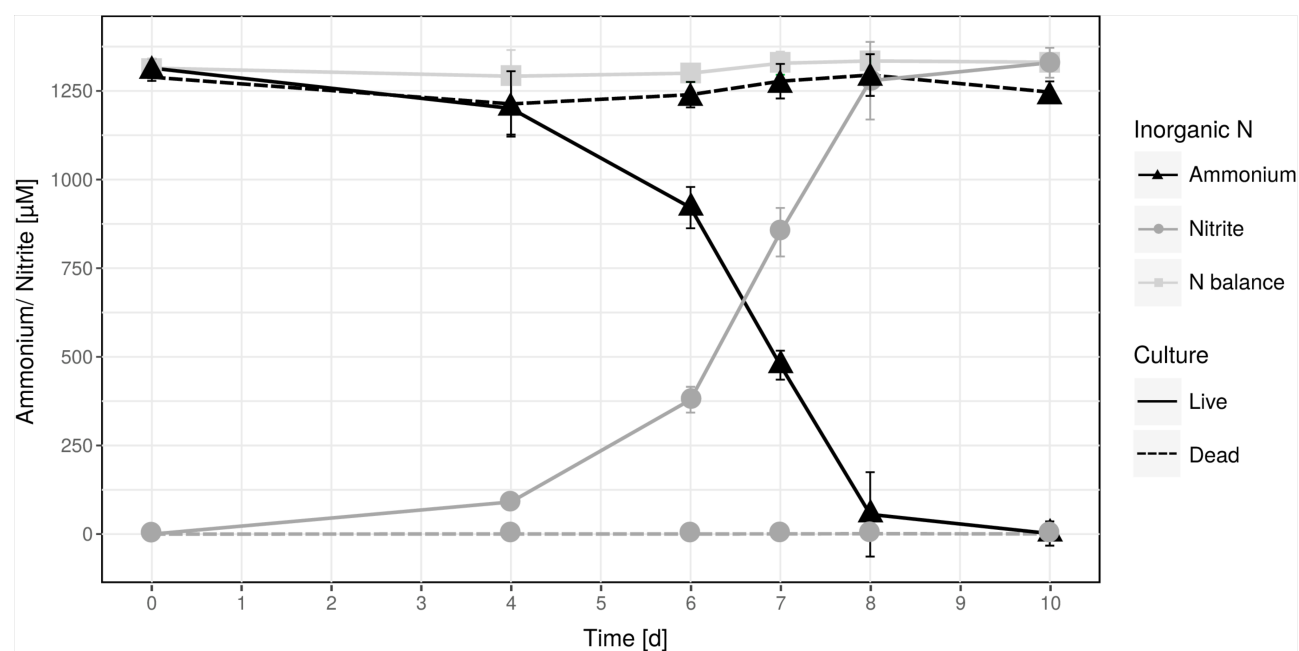

**Figure 1.** Near-stoichiometric oxidation of 1.25 mM ammonium to nitrite by the *Ca. N. islandicus* enrichment culture at 65 °C. Data points show means, error bars show 1 s.d. of n = 3 biological replicates. Solid and dashed lines denote live and dead culture incubations, respectively. If not visible, error bars are smaller than symbols.

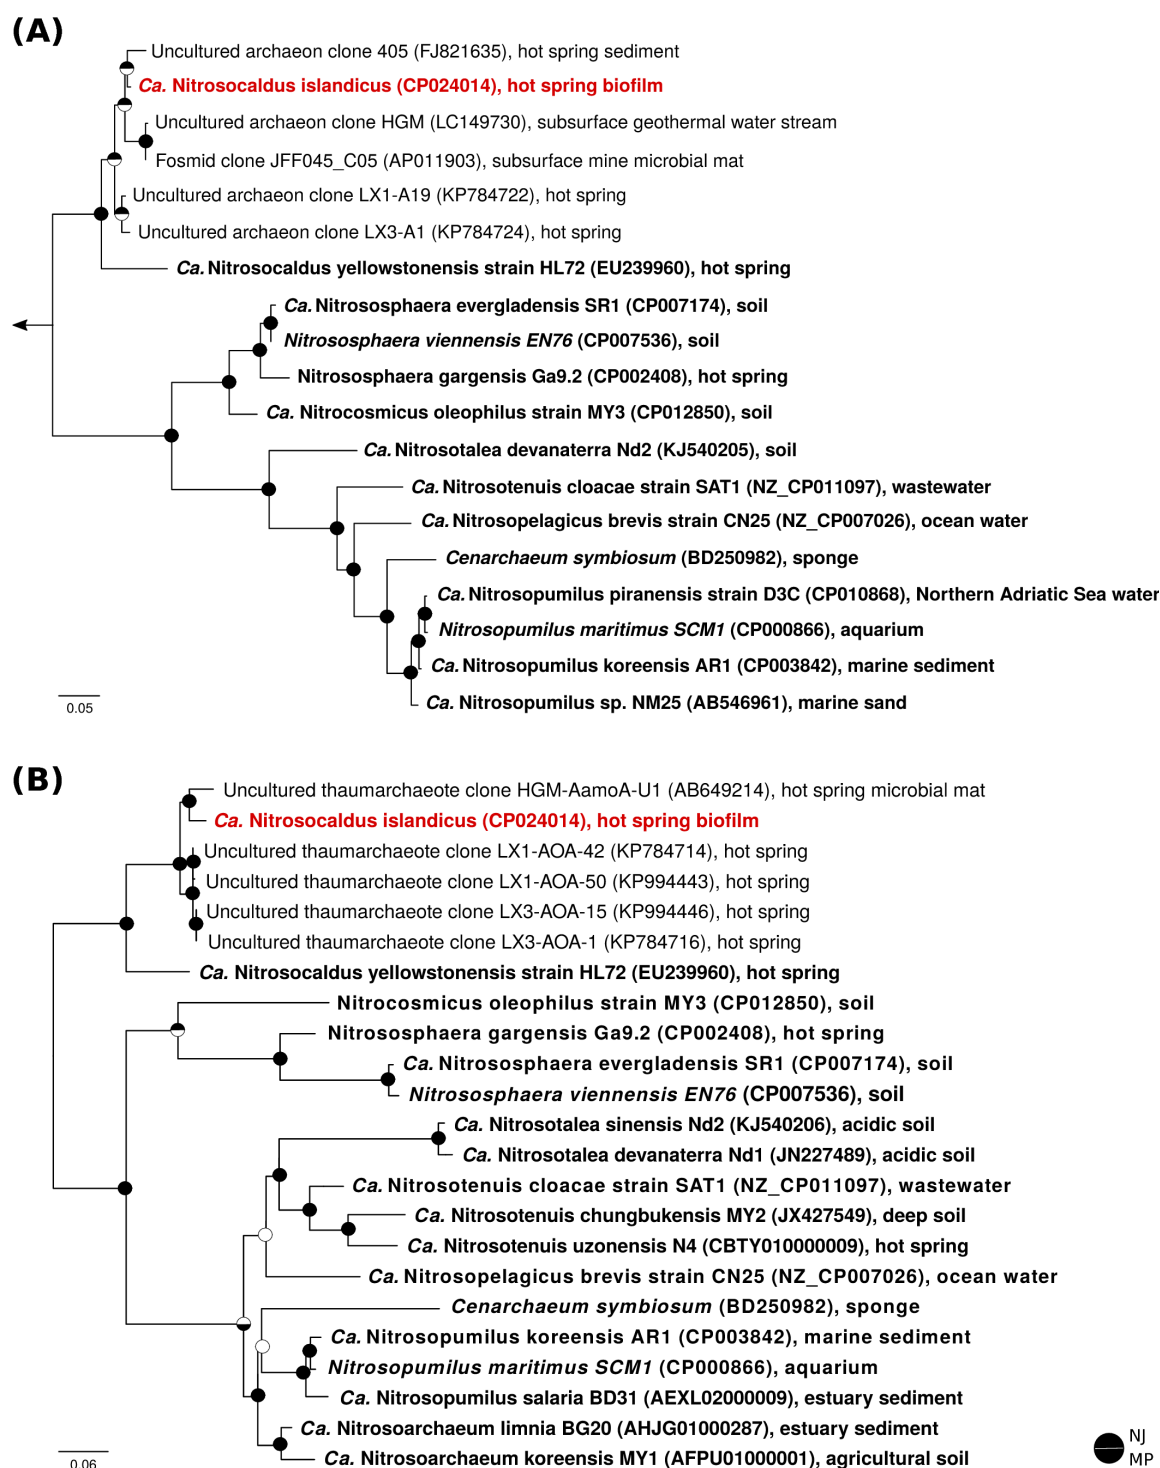

**Figure 2.** 16S rRNA gene-based (A) and *amoA* gene-based (B) maximum likelihood phylogenies of representative *thaumarchaeal* sequences. For each sequence, the accession number and environmental source are indicated. Sequences from pure and enrichment cultures are depicted in bold, and *Ca. N. islandicus* is highlighted in red. The outgroup for the 16S rRNA tree were *aigarchaeal* sequences; the *amoA* phylogeny was calculated unrooted, but artificially rooted to the *Nitrosocaldales* afterwards. Circles at nodes denote support (filled) or no support (open) from Neighbour Joining (NJ, top half) and Maximum Parsimony (MP, bottom half) trees. The scale bars in panels (A) and (B) indicate 9 and 6 % sequence divergence, respectively.



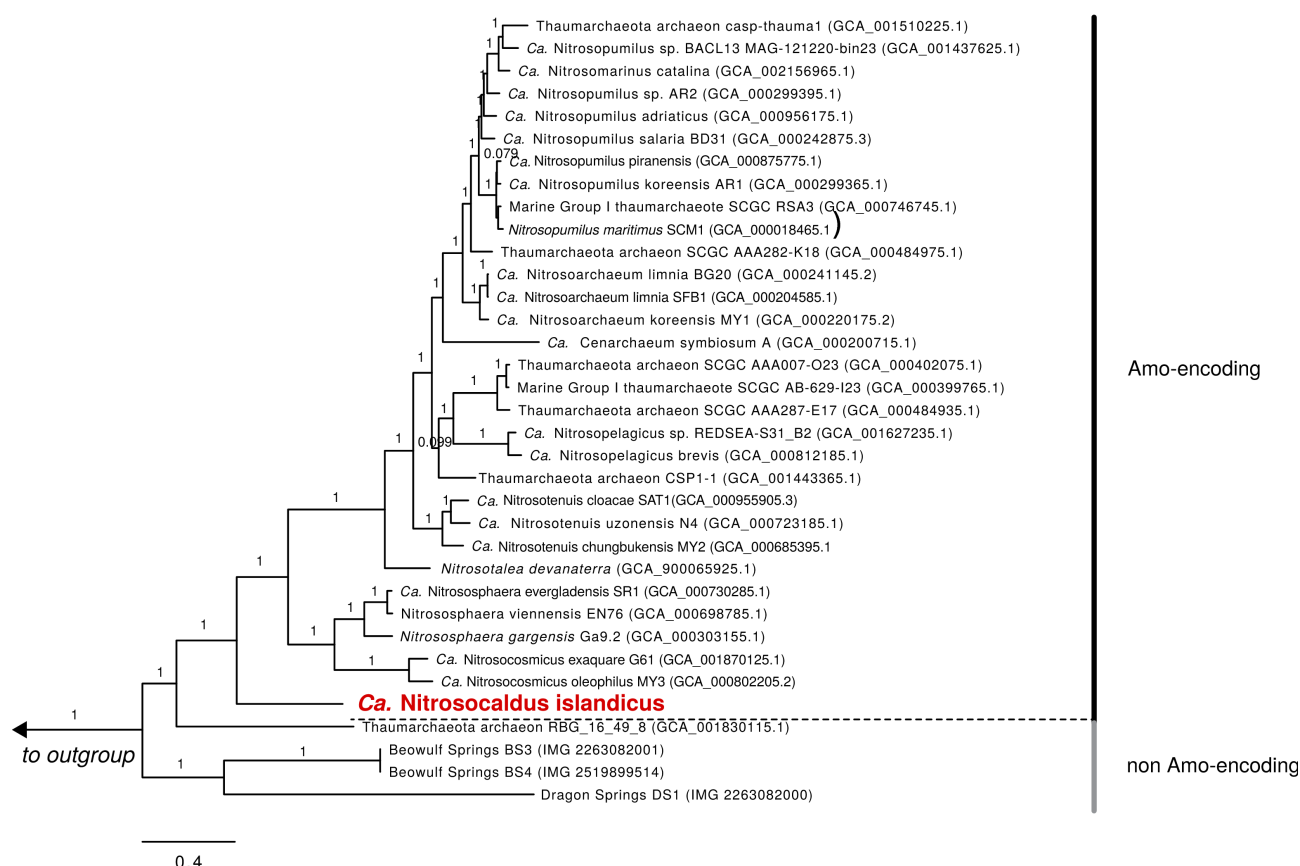

**Figure 3.** Bayesian inference tree of 34 concatenated universal marker proteins from 31 *amoA*-encoding *Thaumarchaea* including the *Nitrosocaldus*-like AOA and 4 non *amoA*-encoding *Thaumarchaea*-like Archaea. Nineteen additional TACK-superphylum (Guy and Ettema, 2011) members (not shown) were used as an outgroup: *Aigarchaea* (assemblies GCA\_000494145.1, GCA\_000270325.1), *Bathyarchaea* (GCA\_001399805.1, GCA\_001399795.1, GCA\_001593865.1, GCA\_001593855.1, GCA\_001593935.1, GCA\_002011035.1, GCA\_001273385.1), *Crenarchaea* (GCA\_000011205.1, GCA\_000591035.1, GCA\_000253055.1, GCA\_000813245.1), *Geothermarchaea* (GCA\_002011075.1), *Korarchaea* (GCA\_000019605.1), *Thorarchaea* (GCA\_001563335.1, GCA\_001563325.1), and *Verstraetearchaea* (GCA\_001717035.1, GCA\_001717015.1). Branches are labelled with average Bayesian posterior probability support over ten independent chains and the scale bar indicates 0.4 amino acid substitutions per site.

565

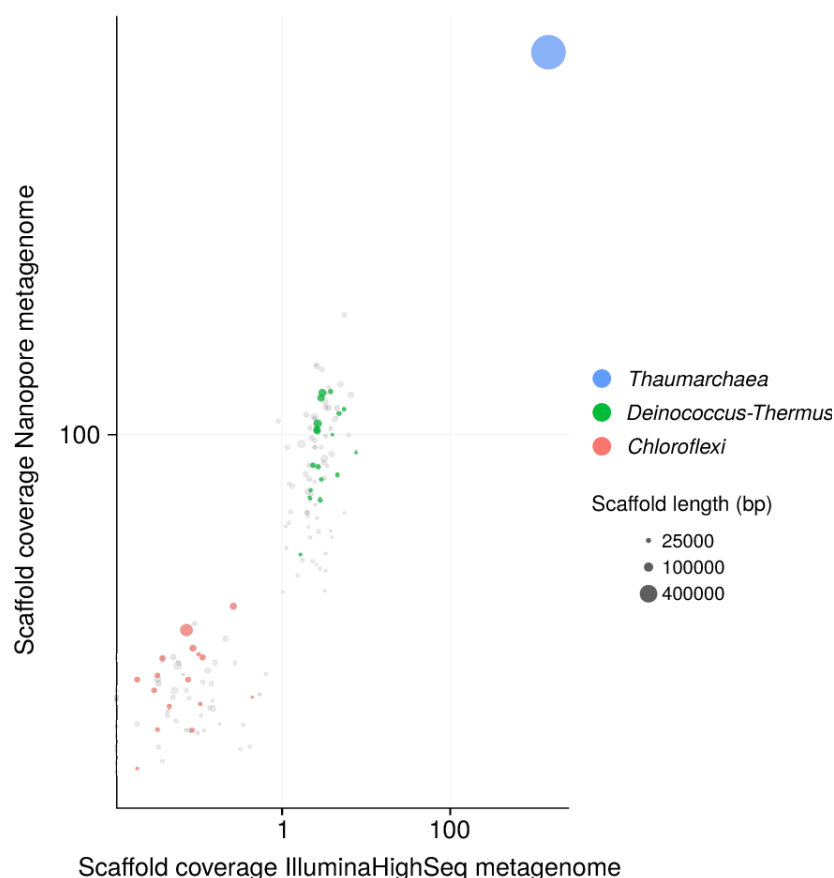

**Figure 4.** Sequence composition-independent binning of the metagenome scaffolds from two ammonia-oxidizing enrichment cultures. Circles represent scaffolds, scaled by the square root of their length. Clusters of similarly coloured circles represent potential genome bins. The x-axis shows binning of the scaffolds from an early enrichment culture, which still included other genera as well (not shown). The y-axis shows binning of the scaffolds from the latest enrichment culture containing only *Ca. N. islandicus* and the two remaining accompanying organisms. Genome bins for the *Thermus* (34 % complete) and the *Chloroflexi* (56 % complete) organism were obtained. The genome bin of the *Chloroflexi* organism contains genes that cluster within a clade of *Nitrobacter*/*Nitrolancea* nitrite oxidoreductase (*nxrAB*) genes (data not shown). Since we did not observe nitrate production by the enrichment culture, the function of these genes remains unknown.

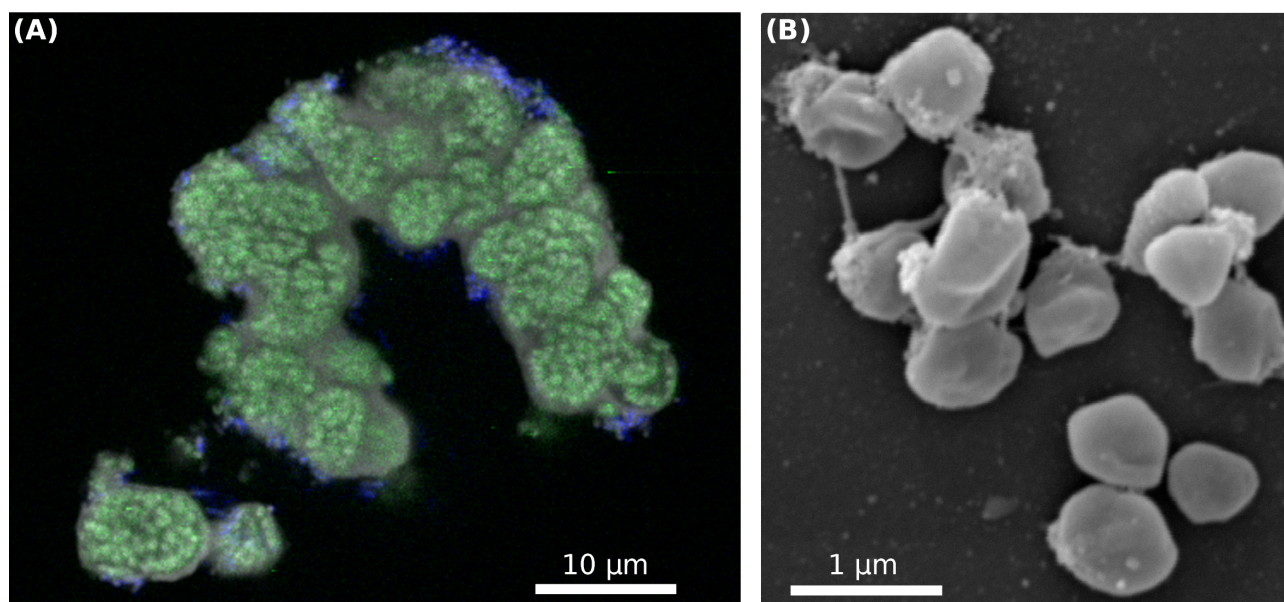

**Figure 5.** (A) FISH analysis of the enrichment culture illustrating the growth in microcolonies and the high relative abundance of *Ca. N. islandicus*. *Ca. N. islandicus* cells appear in green (stained by probe Thaum726 targeting most *Thaumarchaea*) and the bacterial contaminants in blue (labelled by probe EUB338). (B) Scanning electron micrograph of spherically shaped *Ca. Nitrosocaldus islandicus* cells. The cells have a diameter of 0.5 to 0.7  $\mu\text{m}$ . *Ca. N. islandicus* cells were distinguishable from the rod-shaped bacterial contaminants by their smaller size and unique, ‘dented’ spherical shape.

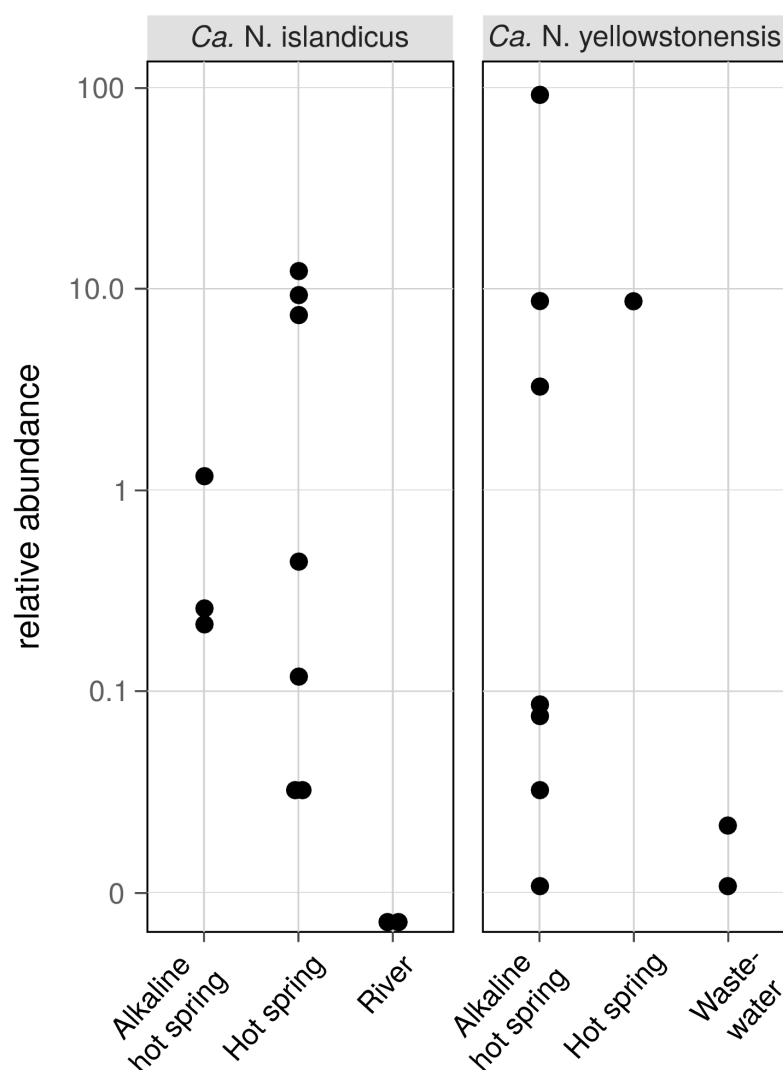

**Figure 6.** Occurrence and abundance of AOA related to *Ca. Nitrosocaldus islandicus* and *Ca. Nitrosocaldus yellowstonensis* in different habitats based on the presence of closely related 16S rRNA gene sequences in all public 16S rRNA gene amplicon datasets. Data shown are log-scale relative abundances of 16S rRNA gene sequences with a minimum similarity of 97 % in a sample (n=12 and n=10 out of 93,045 total datasets for *Ca. N. islandicus* and *Ca. N. yellowstonensis*, respectively). Sequences of the Tibetan waste water data set were retrieved from BioSample SAMN03464927 of Niu *et al.* (2017).





## 610 Supplemental information

**Table S1. *Thaumarchaea* used for comparison of protein coding genes**

| Organism Name                                             | Publication                         | BioSample    | BioProject  | Assembly        |
|-----------------------------------------------------------|-------------------------------------|--------------|-------------|-----------------|
| <i>Thaumarchaeota</i> archaeon casp-thauma1 (Caspian Sea) | 10.7717/peerj.2687                  | SAMN03733542 | PRJNA279271 | GCA_001510225.1 |
| <i>Nitrosopumilus</i> sp. BACL13 MAG-121220-bin23         | 10.1186/s13059-015-0834-7           | SAMN03741946 | PRJNA273799 | GCA_001437625.1 |
| <i>Ca. Nitrosomarinus catalina</i>                        | 10.1111/1462-2920.13768             | SAMN05730076 | PRJNA341864 | GCA_002156965.1 |
| <i>Ca. Nitrosopumilus</i> sp. AR2                         | 10.1128/JB.01869-12                 | SAMN02603138 | PRJNA174388 | GCA_000299395.1 |
| <i>Ca. Nitrosopumilus adriaticus</i>                      | 10.1038/ismej.2015.200              | SAMN03253153 | PRJNA269341 | GCA_000956175.1 |
| <i>Ca. Nitrosopumilus salaria</i> BD31                    | 10.1128/JB.00013-12.                | SAMN00016669 | PRJNA50075  | GCA_000242875.3 |
| <i>Ca. Nitrosopumilus piranensis</i>                      | 10.1038/ismej.2015.200              | SAMN03257648 | PRJNA269924 | GCA_000875775.1 |
| <i>Ca. Nitrosopumilus koreensis</i> AR1                   | 10.1128/JB.01857-12                 | SAMN02603137 | PRJNA174387 | GCA_000299365.1 |
| Marine Group I thaumarchaeote SCGC RSA3 (Red Sea)         | 10.1038/ismej.2014.137              | SAMN02869648 | PRJNA248555 | GCA_000746745.1 |
| <i>Nitrosopumilus maritimus</i> SCM1                      | 10.1073/pnas.0913533107             | SAMN00000032 | PRJNA19265  | GCA_000018465.1 |
| <i>Thaumarchaeota</i> archaeon SCGC AAA282-K18            | 10.3389/fmicb.2016.00143            | SAMN02440765 | PRJNA190793 | GCA_000484975.1 |
| <i>Ca. Nitrosoarchaeum limnia</i> BG20                    | 10.1128/JB.00007-12.                | SAMN00016663 | PRJNA50027  | GCA_000241145.2 |
| <i>Ca. Nitrosoarchaeum limnia</i> SFB1                    | 10.1371/journal.pone.0016626.       | SAMN02471010 | PRJNA52465  | GCA_000204585.1 |
| <i>Ca. Nitrosoarchaeum koreensis</i> MY1                  | 10.1128/JB.05717-11.                | SAMN02470178 | PRJNA67913  | GCA_000220175.2 |
| <i>Ca. Cenarchaeum symbiosum</i> A                        | 10.1073/pnas.0608549103             | SAMN02744041 | PRJNA202    | GCA_000200715.1 |
| <i>Thaumarchaeota</i> archaeon SCGC AAA007-O23            | 10.3389/fmicb.2016.00143            | SAMN02440520 | PRJNA66857  | GCA_000402075.1 |
| Marine Group I thaumarchaeote SCGC AB-629-I23             | 10.1038/ismej.2014.137              | SAMN02441296 | PRJNA165501 | GCA_000399765.1 |
| <i>Thaumarchaeota</i> archaeon SCGC AAA287-E17            | 10.3389/fmicb.2016.00143            | SAMN02441105 | PRJNA190806 | GCA_000484935.1 |
| <i>Nitrosopelagicus</i> sp. REDSEA-S31_B2                 | 10.1038/sdata.2016.50, PMC: 4932879 | SAMN04534603 | PRJNA289734 | GCA_001627235.1 |
| <i>Ca. Nitrosopelagicus brevis</i>                        | 10.1073/pnas.1416223112             | SAMN03273964 | PRJNA223412 | GCA_000812185.1 |
| <i>Thaumarchaeota</i> archaeon CSP1-1 (sediment)          | 10.1111/1462-2920.12930             | SAMN03462092 | PRJNA262935 | GCA_001443365.1 |
| <i>Ca. Nitrosotenuis cloacae</i>                          | 10.1038/srep23747                   | SAMN03286947 | PRJNA272771 | GCA_000955905.3 |
| <i>Ca. Nitrosotenuis uzonensis</i> N4                     | 10.1371/journal.pone.0080835        | SAMEA3139018 | PRJEB4650   | GCA_000723185.1 |
| <i>Ca. Nitrosotenuis chungbukensis</i> MY2                | 10.1128/AEM.03730-13                | SAMN02767256 | PRJNA210247 | GCA_000685395.1 |
| <i>Nitrosotalea devanattera</i>                           | 10.1128/AEM.04031-15                | SAMEA3577360 | PRJEB10948  | GCA_900065925.1 |
| <i>Ca. Nitrososphaera evergladensis</i> SR1               | 10.1371/journal.pone.0101648        | SAMN03081530 | PRJNA235208 | GCA_000730285.1 |
| <i>Nitrososphaera viennensis</i> EN76                     | 10.1073/pnas.1601212113             | SAMN02721150 | PRJEA60103  | GCA_000698785.1 |
| <i>Nitrososphaera gargensis</i> Ga9.2                     | 10.1111/j.1462-2920.2012.02893.x    | SAMN02603264 | PRJNA60505  | GCA_000303155.1 |
| <i>Ca. Nitrosocosmicus exaquare</i> G61                   | 10.1038/ismej.2016.192              | SAMN04606696 | PRJNA317395 | GCA_001870125.1 |
| <i>Ca. Nitrosocosmicus oleophilus</i> MY3                 | 10.1111/1758-2229.12477             | SAMN03074222 | PRJNA210256 | GCA_000802205.2 |

**Table S2. Marker genes used for phylogenomic tree**

| Gene                                 | Pfam Id   | Length | Description                               |
|--------------------------------------|-----------|--------|-------------------------------------------|
| Alanine – tRNA ligase                | TIGR00344 | 847    | Alanine – tRNA ligase                     |
| Ribosomal protein L10                | PF00466   | 100    | Ribosomal protein L10                     |
| Ribosomal protein L11                | PF03946   | 60     | Ribosomal protein L11, N-terminal domain  |
| Ribosomal protein L11                | PF00298   | 69     | Ribosomal protein L11, RNA binding domain |
| Ribosomal protein L13                | PF00572   | 128    | Ribosomal protein L13                     |
| Ribosomal protein L14p/L23e          | PF00238   | 122    | Ribosomal protein L14p/L23e               |
| Ribosomal protein L16p/L10e          | PF00252   | 133    | Ribosomal protein L16p/L10e               |
| Ribosomal protein L18p/L5e           | PF00861   | 119    | Ribosomal protein L18p/L5e                |
| Ribosomal protein L1p/L10e           | PF00687   | 220    | Ribosomal protein L1p/L10e                |
| Ribosomal protein L22p/L17e          | PF00237   | 105    | Ribosomal protein L22p/L17e               |
| Ribosomal protein L23                | PF00276   | 92     | Ribosomal protein L23                     |
| Ribosomal protein L29                | PF00831   | 58     | Ribosomal protein L29                     |
| Ribosomal protein L3                 | PF00297   | 263    | Ribosomal protein L3                      |
| Ribosomal protein L4/L1              | PF00573   | 192    | Ribosomal protein L4/L1                   |
| Ribosomal protein L5                 | PF00281   | 56     | Ribosomal protein L5                      |
| Ribosomal protein L5                 | PF00673   | 95     | Ribosomal protein L5p, C-terminus         |
| Ribosomal protein S11                | PF00411   | 110    | Ribosomal protein S11                     |
| Ribosomal protein S12/S23            | PF00164   | 122    | Ribosomal protein S12/S23                 |
| Ribosomal protein S15                | PF00312   | 83     | Ribosomal protein S15                     |
| Ribosomal protein S17                | PF00366   | 69     | Ribosomal protein S17                     |
| Ribosomal protein S19                | PF00203   | 81     | Ribosomal protein S19                     |
| Ribosomal protein S2                 | PF00318   | 211    | Ribosomal protein S2                      |
| Ribosomal protein S3                 | PF00189   | 85     | Ribosomal protein S3, C-terminal domain   |
| Ribosomal protein S5                 | PF03719   | 74     | Ribosomal protein S5, C-terminal domain   |
| Ribosomal protein S5                 | PF00333   | 67     | Ribosomal protein S5, N-terminal domain   |
| Ribosomal protein S7p/S5e            | PF00177   | 148    | Ribosomal protein S7p/S5e                 |
| Ribosomal protein S8                 | PF00410   | 129    | Ribosomal protein S8                      |
| Ribosomal protein S9/S16             | PF00380   | 121    | Ribosomal protein S9/S16                  |
| Ribosomal Protein L2                 | PF03947   | 130    | Ribosomal Proteins L2, C-terminal domain  |
| Ribosomal protein L2                 | PF00181   | 77     | Ribosomal proteins L2, RNA binding domain |
| RNA polymerase beta subunit          | PF04563   | 203    | RNA polymerase beta subunit               |
| RNA polymerase Rpb1                  | PF04997   | 337    | RNA polymerase Rpb1, domain 1             |
| RNA polymerase Rpb1                  | PF00623   | 166    | RNA polymerase Rpb1, domain 2             |
| RNA polymerase Rpb1                  | PF05000   | 108    | RNA polymerase Rpb1, domain 4             |
| RNA polymerase Rpb2                  | PF04561   | 190    | RNA polymerase Rpb2, domain 2             |
| RNA polymerase Rpb2                  | PF04565   | 68     | RNA polymerase Rpb2, domain 3             |
| RNA polymerase Rpb2                  | PF00562   | 386    | RNA polymerase Rpb2, domain 6             |
| RNA polymerase Rpb2                  | PF04560   | 82     | RNA polymerase Rpb2, domain 7             |
| RNA polymerase Rpb6                  | PF01192   | 57     | RNA polymerase Rpb6                       |
| Signal peptide binding domain        | PF02978   | 104    | Signal peptide binding domain             |
| Translation-initiation factor 2      | PF11987   | 109    | Translation-initiation factor 2           |
| TruB family pseudouridylate synthase | PF01509   | 149    | TruB family pseudouridylate synthase      |
| Valine – tRNA ligase                 | TIGR00422 | 863    | Valine – tRNA ligase                      |

**Table S3.** Genes not present in *Ca. N. islandicus*, but previously present in the “*Thaumarchaea*-core” as defined by<sup>27</sup>

| Locus tag of “core” gene in <i>N. devanaterra</i> | Annotation                                                                                  |
|---------------------------------------------------|---------------------------------------------------------------------------------------------|
| NDEV_v3_0007 ID:23877774                          | DNA polymerase II large subunit                                                             |
| NDEV_v3_0191 ID:23877958                          | Protein pelota homolog                                                                      |
| NDEV_v3_0273 ID:23878040                          | SAM-dependent methyltransferase                                                             |
| NDEV_v3_0276 ID:23878043                          | 5-carboxymethyl-2-hydroxymuconate Delta-isomerase                                           |
| NDEV_v3_0416 ID:23878183                          | methionine sulfoxide reductase B                                                            |
| NDEV_v3_0872 ID:23878639                          | UvrABC system protein C                                                                     |
| NDEV_v3_0873 ID:23878640                          | ATPase and DNA damage recognition protein of nucleotide excision repair excinuclease UvrABC |
| NDEV_v3_0874 ID:23878641                          | excinuclease of nucleotide excision repair, DNA damage recognition component                |
| NDEV_v3_0889 ID:23878656                          | Iron-containing alcohol dehydrogenase                                                       |
| NDEV_v3_0897 ID:23878664                          | Endoribonuclease L-PSP                                                                      |
| NDEV_v3_0915 ID:23878682                          | Double-stranded beta-helix fold enzyme                                                      |
| NDEV_v3_0916 ID:23878683                          | putative methyltransferase type 11                                                          |
| NDEV_v3_0925 ID:23878692                          | Transcriptional regulator, ArsR family                                                      |
| NDEV_v3_0952 ID:23878719                          | Disulfide Bond oxidoreductase D family protein                                              |
| NDEV_v3_1056 ID:23878823                          | Rossmann fold nucleotide-binding protein                                                    |
| NDEV_v3_1068 ID:23878835                          | CMP/dCMP deaminase zinc-binding                                                             |
| NDEV_v3_1143 ID:23878910                          | Oligoendopeptidase, PepF/M3 family                                                          |
| NDEV_v3_1165 ID:23878932                          | Pyruvoyl-dependent arginine decarboxylase                                                   |
| NDEV_v3_1181 ID:23878948                          | putative SMC domain protein                                                                 |
| NDEV_v3_1198 ID:23878965                          | Elongation factor Tu domain 2 protein                                                       |
| NDEV_v3_1303 ID:23879070                          | Peptide methionine sulfoxide reductase MsrA                                                 |
| NDEV_v3_1775 ID:23879542                          | Modification methylase LlaDCHIA                                                             |
| NDEV_v3_1856 ID:23879623                          | putative bacterial transferase hexapeptide (Three repeats)                                  |
| NDEV_v3_1858 ID:23879625                          | Glycosyl transferase family protein                                                         |
| NDEV_v3_2071 ID:23879838                          | Peptidyl-prolyl cis-trans isomerase                                                         |
| NDEV_v3_2075 ID:23879842                          | PfkB domain protein                                                                         |
| NDEV_v3_2078 ID:23879845                          | Putative pyridoxal phosphate-dependent aminotransferase                                     |
| NDEV_v3_2106 ID:23879873                          | DNA-directed DNA polymerase                                                                 |
| NDEV_v3_0018 ID:23877785                          | conserved protein of unknown function                                                       |
| NDEV_v3_0103 ID:23877870                          | Uncharacterized membrane protein required for N-linked glycosylation (Modular protein)      |
| NDEV_v3_0319 ID:23878086                          | conserved protein of unknown function                                                       |
| NDEV_v3_0351 ID:23878118                          | Membrane protein-like protein                                                               |
| NDEV_v3_0419 ID:23878186                          | conserved protein of unknown function                                                       |
| NDEV_v3_0557 ID:23878324                          | conserved protein of unknown function                                                       |
| NDEV_v3_0732 ID:23878499                          | conserved protein of unknown function                                                       |
| NDEV_v3_0831 ID:23878598                          | conserved protein of unknown function                                                       |
| NDEV_v3_0848 ID:23878615                          | conserved protein of unknown function                                                       |
| NDEV_v3_1197 ID:23878964                          | conserved protein of unknown function                                                       |
| NDEV_v3_1246 ID:23879013                          | conserved membrane protein of unknown function                                              |
| NDEV_v3_1619 ID:23879386                          | protein of unknown function                                                                 |
| NDEV_v3_1649 ID:23879416                          | protein of unknown function                                                                 |
| NDEV_v3_1654 ID:23879421                          | conserved protein of unknown function                                                       |
| NDEV_v3_1755 ID:23879522                          | protein of unknown function                                                                 |
| NDEV_v3_1759 ID:23879526                          | conserved protein of unknown function                                                       |
| NDEV_v3_1776 ID:23879543                          | protein of unknown function                                                                 |
| NDEV_v3_1831 ID:23879598                          | protein of unknown function                                                                 |
| NDEV_v3_1852 ID:23879619                          | conserved protein of unknown function                                                       |
| NDEV_v3_1910 ID:23879677                          | Conserved protein of unknown function                                                       |
| NDEV_v3_1936 ID:23879703                          | conserved exported protein of unknown function                                              |
| NDEV_v3_2039 ID:23879806                          | protein of unknown function                                                                 |
| NDEV_v3_0100 ID:23877867                          | Putative nucleic acid binding protein                                                       |
| NDEV_v3_0101 ID:23877868                          | Putative nucleic acid binding protein                                                       |
| NDEV_v3_0267 ID:23878034                          | protein of unknown function                                                                 |
| NDEV_v3_0428 ID:23878195                          | exported protein of unknown function                                                        |
| NDEV_v3_0951 ID:23878718                          | Redoxin domain protein                                                                      |
| NDEV_v3_1248 ID:23879015                          | Methyltransferase type 11                                                                   |
| NDEV_v3_1377 ID:23879144                          | conserved membrane protein of unknown function                                              |
| NDEV_v3_1561 ID:23879328                          | conserved protein of unknown function                                                       |
| NDEV_v3_1613 ID:23879380                          | Methionine synthase                                                                         |
| NDEV_v3_1614 ID:23879381                          | Homocysteine S-methyltransferase                                                            |
| NDEV_v3_1985 ID:23879752                          | DNA topoisomerase type IA zn finger domain protein                                          |
| NDEV_v3_0126 ID:23877893                          | ABC transporter, permease component                                                         |
| NDEV_v3_1837 ID:23879604                          | conserved protein of unknown function                                                       |
| NDEV_v3_0184 ID:23877951                          | DEAD/DEAH box helicase domain protein                                                       |
| NDEV_v3_0023 ID:23877790                          | CCA-adding enzyme                                                                           |
| NDEV_v3_0924 ID:23878691                          | Phosphoribosylaminoimidazole-succinocarboxamide synthase                                    |
| NDEV_v3_0004 ID:23877771                          | conserved protein of unknown function                                                       |
| NDEV_v3_0522 ID:23878289                          | Molecular chaperone                                                                         |
| NDEV_v3_1051 ID:23878818                          | conserved protein of unknown function                                                       |
| NDEV_v3_0413 ID:23878180                          | 4Fe-4S ferredoxin iron-sulfur binding domain protein                                        |
| NDEV_v3_1807 ID:23879574                          | conserved protein of unknown function                                                       |
| NDEV_v3_0792 ID:23878559                          | RNA polymerase Rpb6                                                                         |
| NDEV_v3_0699 ID:23878466                          | Uncharacterized Zn-finger containing protein                                                |
| NDEV_v3_1725 ID:23879492                          | ThiamineS protein                                                                           |

| <b>Table S4. Genome locus tags and annotations of genes discussed in the main text.</b>                                   |                                                                               |                |
|---------------------------------------------------------------------------------------------------------------------------|-------------------------------------------------------------------------------|----------------|
| Gene                                                                                                                      | Product                                                                       | Locus tag      |
| <b>3-hydroxypropionate-4-hydroxybutyrate pathway</b>                                                                      |                                                                               |                |
| accB/pccB                                                                                                                 | Acetyl-CoA/ propionyl-CoA carboxylase, carboxyltransferase subunit            | AOA3F1_v2_0346 |
| accC/pccC                                                                                                                 | acetyl-CoA carboxylase, biotin carboxylase subunit                            | AOA3F1_v2_0345 |
| accA/pccA                                                                                                                 | biotin carboxyl carrier protein of put. acetyl-CoA/ propionyl-CoA carboxylase | AOA3F1_v2_0344 |
|                                                                                                                           | putative methylmalonyl-CoA epimerase                                          | AOA3F1_v2_0551 |
|                                                                                                                           | methylmalonyl-CoA mutase, large subunit                                       | AOA3F1_v2_0552 |
|                                                                                                                           | methylmalonyl-CoA mutase, small subunit, C-terminus                           | AOA3F1_v2_1302 |
|                                                                                                                           | 4-hydroxybutyryl-CoA dehydratase                                              | AOA3F1_v2_0024 |
|                                                                                                                           | 4-hydroxybutyryl-CoA dehydratase                                              | AOA3F1_v2_0025 |
|                                                                                                                           | 3-hydroxybutyryl-CoA dehydratase                                              | AOA3F1_v2_0462 |
|                                                                                                                           | (S)-3-hydroxybutyryl-CoA dehydrogenase (NAD <sup>+</sup> )                    |                |
|                                                                                                                           | Acetoacetyl-CoA thiolase or ketoacyl-CoA thiolase                             |                |
| <b>Candidate genes for 3-hydroxypropionate-4-hydroxybutyrate carbon fixation pathway including alcohol dehydrogenases</b> |                                                                               |                |
| asd                                                                                                                       | aspartate-semialdehyde dehydrogenase                                          | AOA3F1_v2_0008 |
|                                                                                                                           | 3-hydroxyacyl-CoA dehydrogenase                                               | AOA3F1_v2_1520 |
| acs                                                                                                                       | Acetyl-coenzyme A synthetase                                                  | AOA3F1_v2_0573 |
| acsA-1                                                                                                                    | Acetyl-coenzyme A synthetase                                                  | AOA3F1_v2_0981 |
| acsA-2                                                                                                                    | Acetyl-coenzyme A synthetase                                                  | AOA3F1_v2_1057 |
| gabD                                                                                                                      | succinate-semialdehyde dehydrogenase                                          | AOA3F1_v2_0424 |
|                                                                                                                           | Succinate-semialdehyde dehydrogenase (acetylating)                            | AOA3F1_v2_0975 |
|                                                                                                                           | acetoacetyl-CoA thiolase or ketoacyl-CoA thiolase                             | AOA3F1_v2_0535 |
|                                                                                                                           | acetoacetyl-CoA thiolase                                                      | AOA3F1_v2_0064 |
|                                                                                                                           | putative CoA-binding protein                                                  | AOA3F1_v2_0829 |
|                                                                                                                           | Protein with CoA-binding domain                                               | AOA3F1_v2_0830 |
|                                                                                                                           |                                                                               |                |
| <b>Tricarboxylic acid cycle</b>                                                                                           |                                                                               |                |
| gltA                                                                                                                      | citrate synthase                                                              | AOA3F1_v2_0976 |
| acnA                                                                                                                      | aconitate hydratase                                                           | AOA3F1_v2_0442 |
|                                                                                                                           | putative isocitrate/isopropylmalate dehydrogenase                             | AOA3F1_v2_1453 |
| (o)orAC                                                                                                                   | 2:oxoacid-ferredoxin oxidoreductase, fused alpha and gamma subunit            | AOA3F1_v2_1720 |
|                                                                                                                           | 2:oxoacid-ferredoxin oxidoreductase, beta subunit                             | AOA3F1_v2_1719 |
| (o)orB                                                                                                                    | succinyl-CoA ligase, subunit alpha                                            | AOA3F1_v2_1193 |
| sucD                                                                                                                      | succinyl-CoA ligase, subunit beta                                             | AOA3F1_v2_1192 |
| sucC                                                                                                                      | succinate dehydrogenase flavoprotein subunit/fumarate reductase               | AOA3F1_v2_1407 |
| sdhA                                                                                                                      | putative succinate dehydrogenase/fumarate reductase                           | AOA3F1_v2_1406 |
| (sdhC)                                                                                                                    | putative succinate dehydrogenase/fumarate reductase                           | AOA3F1_v2_1405 |
| (sdhD)                                                                                                                    | FeS-center protein of succinate dehydrogenase/fumarate reductase              | AOA3F1_v2_1404 |
| sdhB                                                                                                                      | fumarate hydratase                                                            | AOA3F1_v2_0771 |
| fumC                                                                                                                      | malate dehydrogenase                                                          | AOA3F1_v2_0339 |
| mdh                                                                                                                       | NAD(P)-dependent malic enzyme                                                 | AOA3F1_v2_1553 |
| ytsJ                                                                                                                      |                                                                               |                |
| <b>Gluconeogenesis</b>                                                                                                    |                                                                               |                |
| pckA                                                                                                                      | ATP-dependent phosphoenolpyruvate carboxykinase                               | AOA3F1_v2_0396 |
| ppdk                                                                                                                      | pyruvate, phosphate dikinase                                                  | AOA3F1_v2_1141 |
| eno                                                                                                                       | enolase                                                                       | AOA3F1_v2_0437 |
| apgM                                                                                                                      | 2,3-bisphosphoglycerate-independent phosphoglycerate mutase                   | AOA3F1_v2_0723 |
|                                                                                                                           | putative 2,3-bisphosphoglycerate-dependent phosphoglycerate mutase            | AOA3F1_v2_0364 |
| (gpmB)                                                                                                                    | phosphoglycerate kinase                                                       | AOA3F1_v2_1746 |
| pgk                                                                                                                       | putative glyceraldehyde-3-phosphate dehydrogenase, phosphorylating            | AOA3F1_v2_0467 |
| (gap)                                                                                                                     | triosephosphate isomerase                                                     | AOA3F1_v2_1135 |
| tpiA                                                                                                                      | Inositol-1-monophosphatase/ bifunctional fructose-1,6-bisphosphatase          | AOA3F1_v2_1480 |
| fbp                                                                                                                       |                                                                               |                |
| <b>11 subunit version of Complex I: type I NADH dehydrogenase (nuoEFG absent)</b>                                         |                                                                               |                |
| nuoA                                                                                                                      | NADH-quinone oxidoreductase, subunit A                                        | AOA3F1_v2_1711 |
| nuoB                                                                                                                      | NADH-quinone oxidoreductase, subunit B                                        | AOA3F1_v2_1710 |
| nuoC                                                                                                                      | NADH-quinone oxidoreductase, subunit C                                        | AOA3F1_v2_1709 |
| nuoD                                                                                                                      | NADH-quinone oxidoreductase, subunit D                                        | AOA3F1_v2_1708 |
| nuoH                                                                                                                      | NADH-quinone oxidoreductase, subunit H                                        | AOA3F1_v2_1707 |
| nuoI                                                                                                                      | NADH-quinone oxidoreductase, subunit I                                        | AOA3F1_v2_1706 |
| nuoJ                                                                                                                      | NADH-quinone oxidoreductase, subunit J                                        | AOA3F1_v2_1705 |
| nuoK                                                                                                                      | NADH-quinone oxidoreductase, subunit K                                        | AOA3F1_v2_1703 |
| nuoM                                                                                                                      | NADH-quinone oxidoreductase, subunit M                                        | AOA3F1_v2_1702 |
| nuoL                                                                                                                      | NADH-quinone oxidoreductase, subunit L                                        | AOA3F1_v2_1701 |
| nuoN                                                                                                                      | NADH-quinone oxidoreductase, subunit N                                        | AOA3F1_v2_1699 |

| <b>Table S4 continued</b>                                                                                                                                                              |                                                                           |                |
|----------------------------------------------------------------------------------------------------------------------------------------------------------------------------------------|---------------------------------------------------------------------------|----------------|
| alternative NADH dehydrogenases, type-II NADH dehydrogenase, Coenzyme F420 dependent NADP dehydrogenase, nitroreductases, NADH-dependent FMN reductases, FAD dependent oxidoreductases |                                                                           |                |
|                                                                                                                                                                                        | putative FAD-dependent pyridine nucleotide-disulphide oxidoreductase      | AOA3F1_v2_0069 |
|                                                                                                                                                                                        | putative NADH dehydrogenase/NAD(P)H nitroreductase AF_0226                | AOA3F1_v2_1059 |
|                                                                                                                                                                                        | FAD/NAD(P)-binding oxidoreductase                                         | AOA3F1_v2_1072 |
|                                                                                                                                                                                        | Geranylgeranyl reductase family protein                                   | AOA3F1_v2_1423 |
| <b>Complex II</b>                                                                                                                                                                      |                                                                           |                |
| sdhA                                                                                                                                                                                   | succinate dehydrogenase flavoprotein subunit/fumarate reductase           | AOA3F1_v2_1407 |
| (sdhC)                                                                                                                                                                                 | putative succinate dehydrogenase/fumarate reductase                       | AOA3F1_v2_1406 |
| (sdhD)                                                                                                                                                                                 | putative succinate dehydrogenase/fumarate reductase                       | AOA3F1_v2_1405 |
| sdhB                                                                                                                                                                                   | FeS-center protein of succinate dehydrogenase/fumarate reductase          | AOA3F1_v2_1404 |
| <b>Complex III: 1.10.2.2</b>                                                                                                                                                           |                                                                           |                |
| petB                                                                                                                                                                                   | cytochrome b/b6 domain                                                    | AOA3F1_v2_1784 |
|                                                                                                                                                                                        | Rieske iron sulfur protein                                                | AOA3F1_v2_1785 |
|                                                                                                                                                                                        | putative Rieske (2Fe-2S) domain protein                                   | AOA3F1_v2_1749 |
| <b>Complex IV</b>                                                                                                                                                                      |                                                                           |                |
|                                                                                                                                                                                        | conserved hypothetical protein                                            | AOA3F1_v2_0365 |
| (coxB)                                                                                                                                                                                 | putative heme-copper oxidase subunit II                                   | AOA3F1_v2_0366 |
| coxA                                                                                                                                                                                   | Cytochrome c oxidase polypeptide 1                                        | AOA3F1_v2_0367 |
|                                                                                                                                                                                        | blue (type 1) copper domain protein                                       | AOA3F1_v2_0368 |
|                                                                                                                                                                                        | putative Blue (Type 1) copper domain protein                              | AOA3F1_v2_0302 |
|                                                                                                                                                                                        | putative cytochrome oxidase assembly protein                              | AOA3F1_v2_0369 |
| <b>Complex V: A1A0-type ATPase</b>                                                                                                                                                     |                                                                           |                |
| atpE                                                                                                                                                                                   | archaeal A1A0-type ATP synthase, subunit E                                | AOA3F1_v2_0087 |
| atpA                                                                                                                                                                                   | archaeal A1A0-type ATP synthase, subunit A                                | AOA3F1_v2_0086 |
| atpB                                                                                                                                                                                   | archaeal A1A0-type ATP synthase, subunit B                                | AOA3F1_v2_0085 |
| atpD                                                                                                                                                                                   | archaeal A1A0-type ATP synthase, subunit D                                | AOA3F1_v2_0084 |
| atpK                                                                                                                                                                                   | archaeal A1A0-type ATP synthase, subunit K                                | AOA3F1_v2_0082 |
| atpI                                                                                                                                                                                   | archaeal A1A0-type ATP synthase, subunit I                                | AOA3F1_v2_0081 |
| atpC                                                                                                                                                                                   | archaeal A1A0-type ATP synthase, subunit C                                | AOA3F1_v2_0080 |
| atpF                                                                                                                                                                                   | archaeal A1A0-type ATP synthase, subunit F                                | AOA3F1_v2_0836 |
| <b>Electron carriers, plastocyanines</b>                                                                                                                                               |                                                                           |                |
|                                                                                                                                                                                        | blue (type 1) copper domain protein                                       | AOA3F1_v2_0368 |
|                                                                                                                                                                                        | blue (type 1) copper domain protein                                       | AOA3F1_v2_1174 |
|                                                                                                                                                                                        | blue (type 1) copper domain protein                                       | AOA3F1_v2_0302 |
|                                                                                                                                                                                        | putative blue (type 1) copper domain protein                              | AOA3F1_v2_0302 |
|                                                                                                                                                                                        | putative blue (type 1) copper domain protein                              | AOA3F1_v2_1780 |
|                                                                                                                                                                                        | putative blue (type 1) copper domain protein (fragment)                   | AOA3F1_v2_1088 |
| <b>Multicopper oxygenases</b>                                                                                                                                                          |                                                                           |                |
|                                                                                                                                                                                        | multicopper oxidase type 3 (MCO1)                                         | AOA3F1_v2_1374 |
| <b>Ammonia-monooxygenase</b>                                                                                                                                                           |                                                                           |                |
| amoB                                                                                                                                                                                   | putative archaeal ammonia monooxygenase subunit B                         | AOA3F1_v2_1440 |
| amoC                                                                                                                                                                                   | Ammonia monooxygenase/methane monooxygenase, subunit C                    | AOA3F1_v2_1439 |
| amoX                                                                                                                                                                                   | conserved hypothetical protein                                            | AOA3F1_v2_1438 |
| amoA                                                                                                                                                                                   | putative archaeal ammonia monooxygenase subunit A                         | AOA3F1_v2_1437 |
| <b>Urease</b>                                                                                                                                                                          |                                                                           |                |
| ureD                                                                                                                                                                                   | Urease accessory protein UreD                                             | AOA3F1_v2_0945 |
| ureG                                                                                                                                                                                   | Urease accessory protein UreG                                             | AOA3F1_v2_0944 |
| ureF                                                                                                                                                                                   | Urease accessory protein UreF                                             | AOA3F1_v2_0943 |
| ureE                                                                                                                                                                                   | Urease accessory protein UreE                                             | AOA3F1_v2_0942 |
| ureC                                                                                                                                                                                   | Urease subunit alpha                                                      | AOA3F1_v2_0939 |
| ureB                                                                                                                                                                                   | Urease subunit beta                                                       | AOA3F1_v2_0938 |
| ureA                                                                                                                                                                                   | Urease gamma subunit                                                      | AOA3F1_v2_0937 |
| <b>Nitrilase/cyanide hydratase</b>                                                                                                                                                     |                                                                           |                |
|                                                                                                                                                                                        | putative Nitrilase/cyanide hydratase and apolipoprotein N-acyltransferase | AOA3F1_v2_0558 |
| <b>Detoxification</b>                                                                                                                                                                  |                                                                           |                |
| (cld)                                                                                                                                                                                  | putative chlorite dismutase                                               | AOA3F1_v2_1762 |
| sod                                                                                                                                                                                    | Superoxide dismutase [Fe]                                                 | AOA3F1_v2_0392 |



| <b>Table S4 continued</b>         |                                                                           |                |
|-----------------------------------|---------------------------------------------------------------------------|----------------|
| <b>Flagellum and Chemotaxis</b>   |                                                                           |                |
| (flaK)                            | putative archaeal preflagellin peptidase FlaK                             | AOA3F1_v2_0613 |
| flaB                              | archaeal flagellin                                                        | AOA3F1_v2_0578 |
|                                   | hypothetical protein                                                      | AOA3F1_v2_0579 |
| flaG                              | flagellar protein FlaG                                                    | AOA3F1_v2_0580 |
| flaF                              | flagellar protein FlaF                                                    | AOA3F1_v2_0581 |
| flaH                              | flagella protein FlaH                                                     | AOA3F1_v2_0582 |
| (flaJ)                            | putative flagella assembly protein FlaJ                                   | AOA3F1_v2_0583 |
| flaI                              | archaeal flagella protein FlaI                                            | AOA3F1_v2_0584 |
| (cheR)                            | putative chemotaxis MCP methyltransferase CheR                            | AOA3F1_v2_0585 |
| cheD                              | chemoreceptor glutamine deamidase CheD                                    | AOA3F1_v2_0586 |
| (cheC)                            | putative chemotaxis protein CheC                                          | AOA3F1_v2_0587 |
| cheA                              | chemotactic sensor histidine kinase CheA                                  | AOA3F1_v2_0594 |
| cheB                              | chemotaxis response regulator methylesterase CheB                         | AOA3F1_v2_0593 |
| cheY                              | chemotaxis response regulator CheY                                        | AOA3F1_v2_0592 |
| cheW                              | chemotaxis protein CheW                                                   | AOA3F1_v2_0591 |
| (MCP)                             | putative methyl-accepting chemotaxis protein                              | AOA3F1_v2_0590 |
| (MCP)                             | putative methyl-accepting chemotaxis protein                              | AOA3F1_v2_0589 |
|                                   | putative HEAT repeat-containing PBS lyase                                 | AOA3F1_v2_0153 |
| <b>S assimilation</b>             |                                                                           |                |
| (cysA)                            | putative thiosulfate sulfurtransferase                                    | AOA3F1_v2_1414 |
| sat                               | Sulfate adenylyltransferase                                               | AOA3F1_v2_0054 |
| (cysC)                            | putative adenylyl-sulfate kinase                                          | AOA3F1_v2_1343 |
| cysH                              | Thioredoxin-dependent 5'-adenylylsulfate reductase                        | AOA3F1_v2_0053 |
| sir                               | Ferredoxin-sulfite/nitrite reductase                                      | AOA3F1_v2_0949 |
|                                   | Rhodenase-Sulfurtransferase                                               | AOA3F1_v2_0950 |
| <b>Amino acid fermentation</b>    |                                                                           |                |
| ilvE                              | putative branched-chain-amino-acid aminotransferase                       | AOA3F1_v2_1069 |
| ilvE-2                            | putative branched-chain-amino-acid aminotransferase                       | AOA3F1_v2_1492 |
| aspC                              | Aspartate/ tyrosine/ aromatic aminotransferase                            | AOA3F1_v2_1546 |
| gdhA                              | Glutamate dehydrogenase                                                   | AOA3F1_v2_0468 |
| iorB                              | Indolepyruvate oxidoreductase, beta subunit                               | AOA3F1_v2_1273 |
|                                   | Indolepyruvate ferredoxin oxidoreductase, alpha subunit                   | AOA3F1_v2_1272 |
| iorA                              |                                                                           | AOA3F1_v2_1272 |
| acs                               | Acetyl-coenzyme A synthetase                                              | AOA3F1_v2_0573 |
| acsA                              | Acetyl-coenzyme A synthetase                                              | AOA3F1_v2_0981 |
| acsA                              | Acetyl-coenzyme A synthetase                                              | AOA3F1_v2_1057 |
|                                   | Acyl-CoA synthetase (NDP forming)                                         | AOA3F1_v2_1415 |
| sir                               | Ferredoxin-sulfite/nitrite reductase                                      | AOA3F1_v2_0949 |
| korB                              | 2-oxoglutarate synthase subunit beta                                      | AOA3F1_v2_1719 |
| korA                              | 2-oxoglutarate synthase subunit alpha                                     | AOA3F1_v2_1720 |
| <b>Hydrogenase</b>                |                                                                           |                |
| (hypA)                            | putative Hydrogenase nickel incorporation protein HypA                    | AOA3F1_v2_1388 |
|                                   | putative Hydrogenase 2 maturation protease                                | AOA3F1_v2_1387 |
| (hydA)                            | Nickel-dependent hydrogenase alpha subunit                                | AOA3F1_v2_1386 |
| (hydD)                            | putative Nickel-dependent hydrogenase delta subunit                       | AOA3F1_v2_1385 |
| (hydG)                            | putative Nickel-dependent hydrogenase gamma subunit                       | AOA3F1_v2_1384 |
|                                   | putative Cyclic nucleotide-binding protein, hydrogenase accessory protein | AOA3F1_v2_1383 |
| (hydB)                            | putative Nickel-dependent hydrogenase beta subunit                        | AOA3F1_v2_1382 |
| hypF                              | putative carbamoyltransferase HypF                                        | AOA3F1_v2_1380 |
| (hypC/hupF)                       | putative Hydrogenase assembly chaperone HypC/HupF                         | AOA3F1_v2_1255 |
| <b>DNA replication and repair</b> |                                                                           |                |
| dbh2                              | DNA polymerase IV                                                         | AOA3F1_v2_0742 |
| dpo                               | DNA polymerase B1                                                         | AOA3F1_v2_0645 |
|                                   | putative primase / polymerase                                             | AOA3F1_v2_0930 |
| priB                              | DNA primase large subunit PriL                                            | AOA3F1_v2_0032 |
| priA                              | putative DNA primase small subunit PriS                                   | AOA3F1_v2_0030 |
| dnaG                              | DNA primase DnaG                                                          | AOA3F1_v2_0952 |

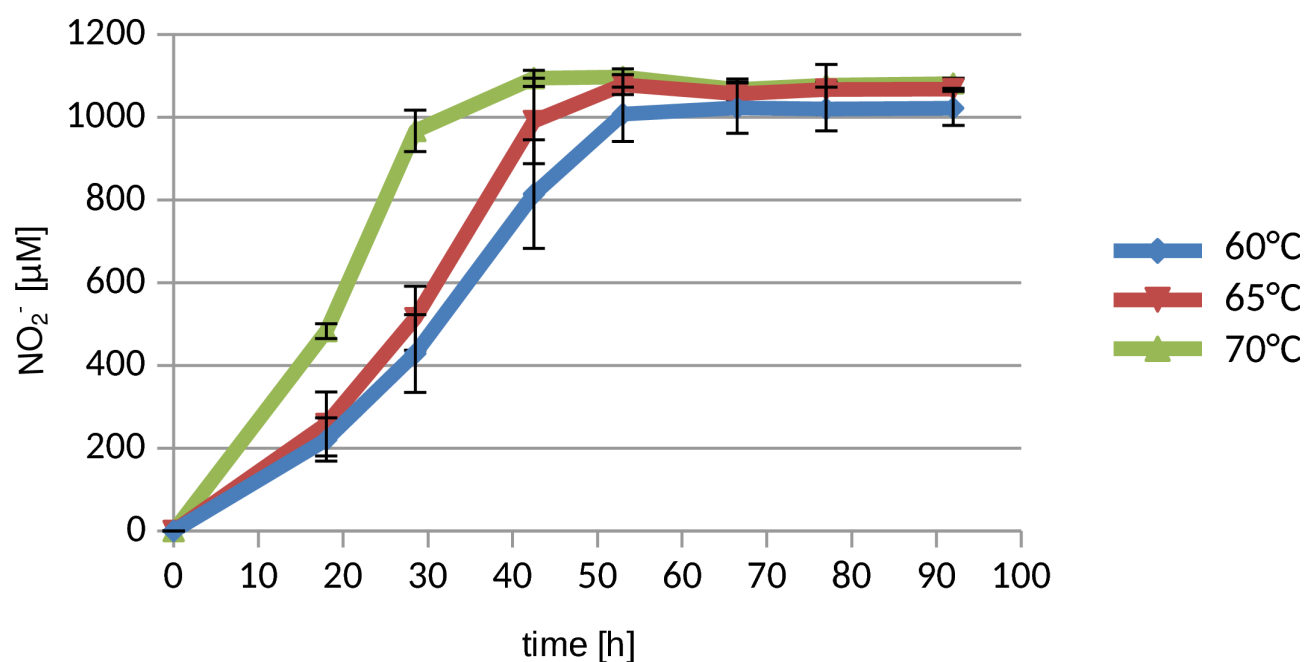

**Figure S1.** Nitrite accumulation through oxidation of ammonia at three different temperatures. Data points show means, error bars show standard errors of  $n = 3$  biological replicates.

625

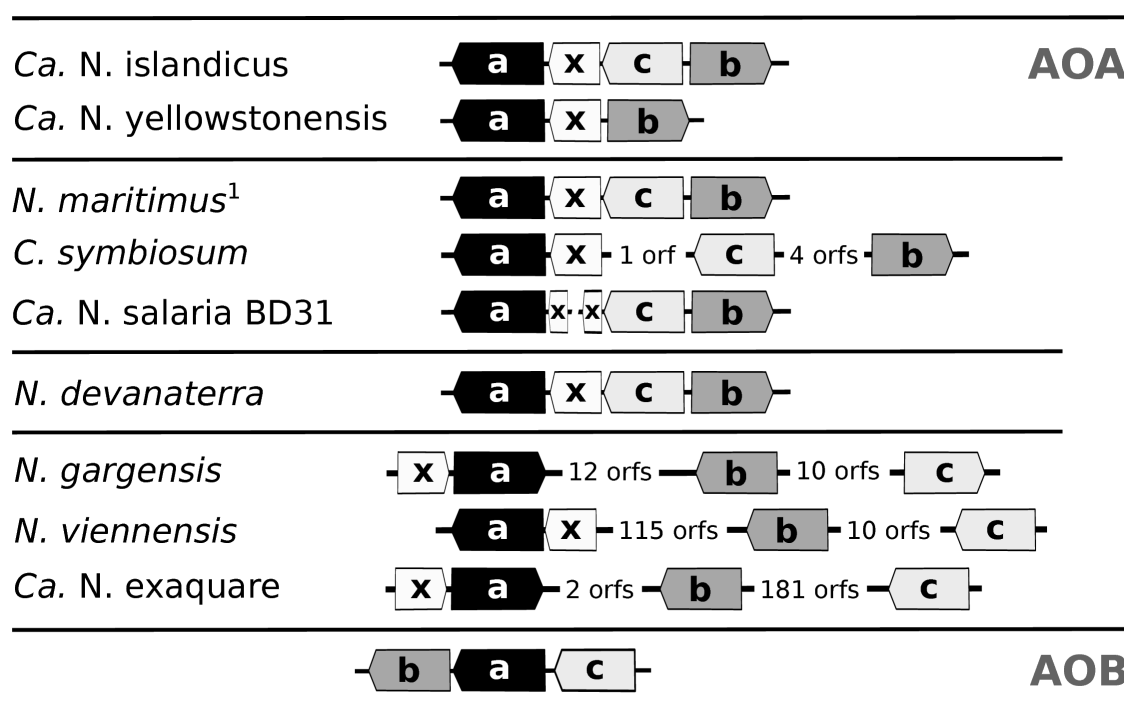

**Figure S2.** Gene order and orientation of the ammonia monooxygenase subunits (*amoA*, *amoB*, *amoC*, and the putative “*amoX*”) in *Ca. N. islandicus* and other Thaumarchaea. The gene order of ammonia-oxidizing bacteria (AOB) is given on the bottom as a reference. <sup>1</sup> also represents the gene arrangement in *Ca. N. limnia*, *Ca. N. koreensis* and *Ca. N. uzonensis*. The figure is a modified version of the figure 26.3 in (28)

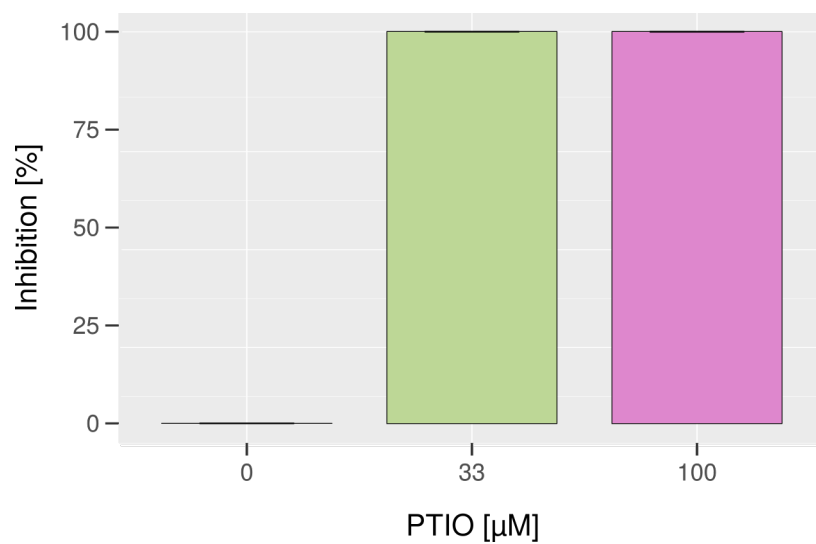

**Figure S3.** Inhibition of ammonia oxidation by *Ca. N. islandicus* caused by different concentrations of the NO-scavenger 2-phenyl-4,4,5,5-tetramethylimidazoline-1-oxyl 3-oxide (PTIO). Error bars show the standard error of two replicates.

635

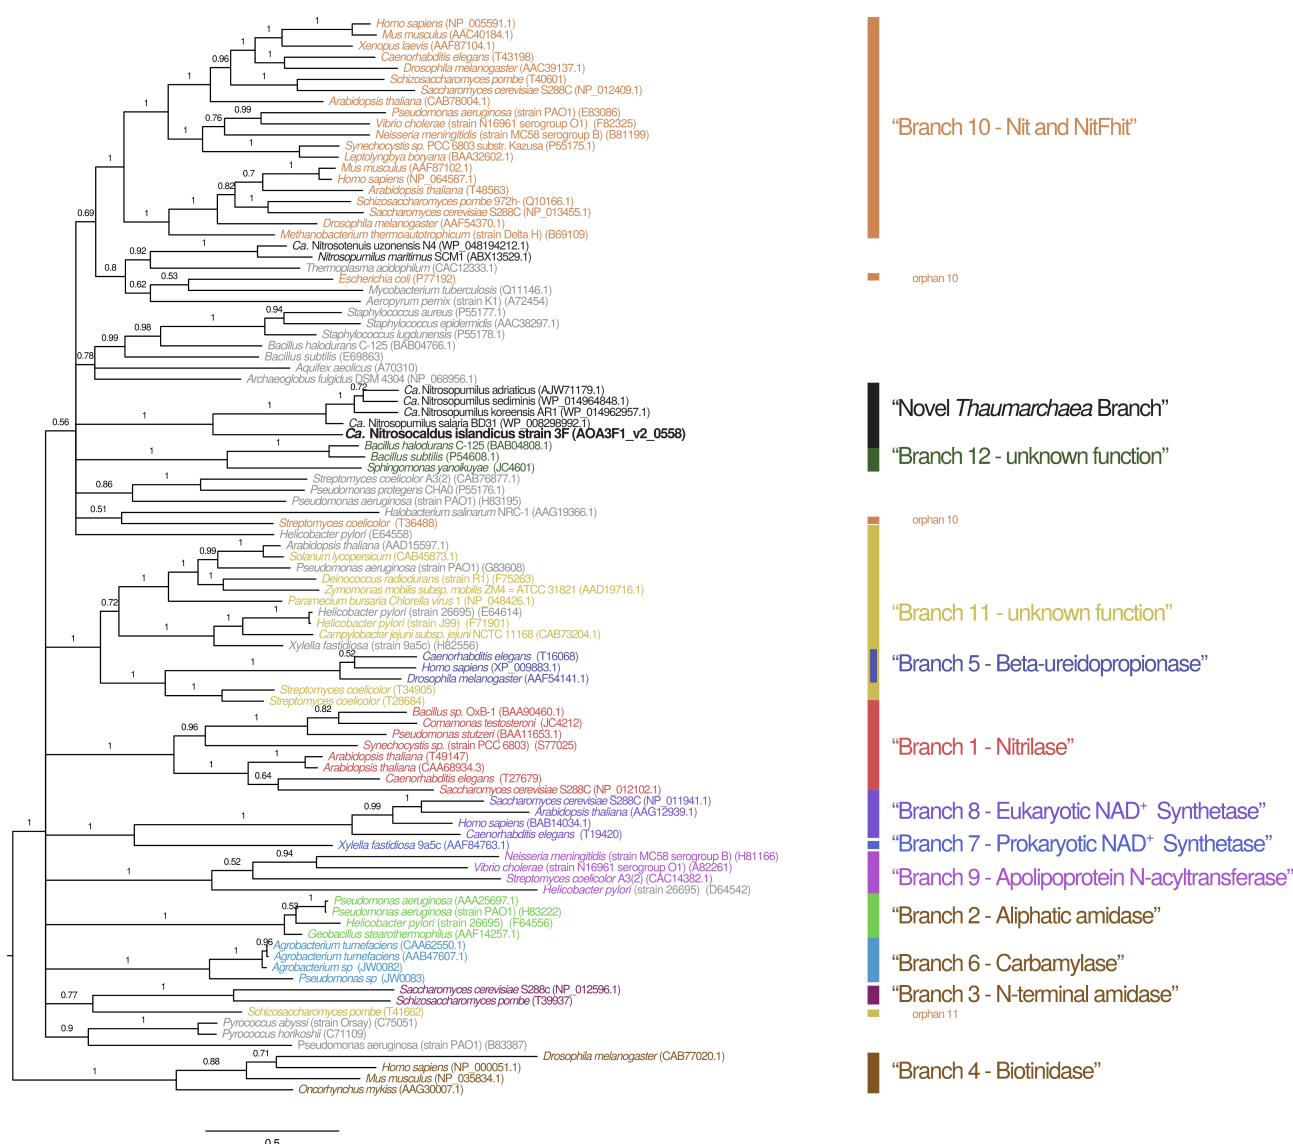

**Figure S4.** Phylogenetic tree of nitrilase superfamily members showing placement of *Ca. Nitrosocaldus islandicus* strain 3F in a novel branch consisting of *Thaumarchaea* (Novel *Thaumarchaea* branch). Sequences and branch labels are from (29). Grey labels indicate “nonfused outliers” as indicated by (29) which were not assigned to any of the 12 named branches. Black labels indicate sequences obtained from the *thaumarchaeal* genomes. Sequences assigned to branches 10 and 11 in (29) that do not clade with other members of those branches in this phylogenetic tree are labelled “orphan”.



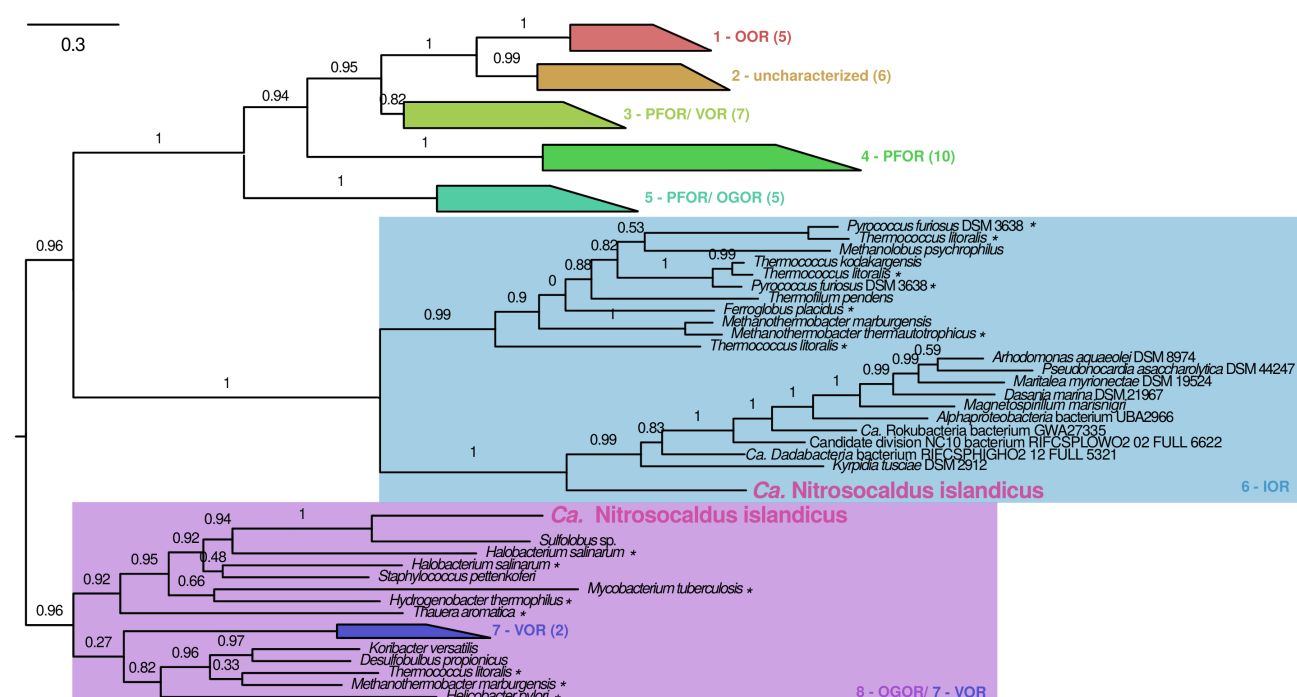

**Fig. S5.** Unrooted phylogenetic tree of 2-oxoacid oxidoreductases (OFORs) showing placement of the two OFORs present in *Ca. Nitrosocaldus islandicus* strain 3F. Clade labels and most sequences are from (30). Numbers in brackets show the number of sequences in collapsed clades. Functionally characterized enzymes are indicated with a “\*”. OOR, oxalate oxidoreductase; PFOR, pyruvate:ferredoxin oxidoreductase; VOR, 2-ketoisovalerate oxidoreductase; OGOR, 2-oxoglutarate oxidoreductase; IOR, indolepyruvate oxidoreductase.

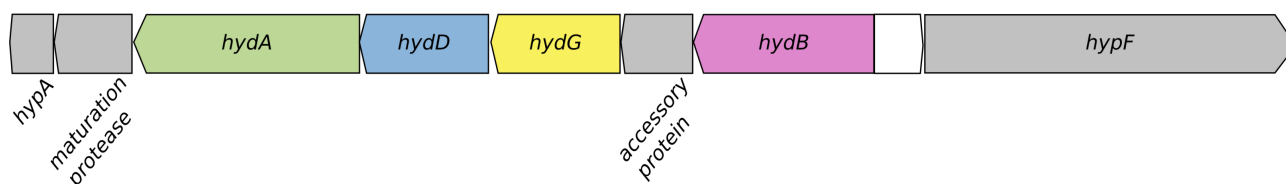

650 **Figure S6.** Schematic illustration of the genomic locus in *Ca. Nitrosocaldus islandicus* that encodes a bidirectional, NADP(H)-coupled type 3b [NiFe] hydrogenase. The locus contains the genes of the hydrogenase subunits *hydADGB* and of accessory proteins involved in enzyme maturation. Genes are drawn to scale. Locus tags (as found on MaGe) from left to right are as follows:  
 655 AOA3F1\_v2\_1388, AOA3F1\_v2\_1387, AOA3F1\_v2\_1386, AOA3F1\_v2\_1385,  
 AOA3F1\_v2\_1384, AOA3F1\_v2\_1383, AOA3F1\_v2\_1382, AOA3F1\_v2\_1381,  
 AOA3F1\_v2\_1380.

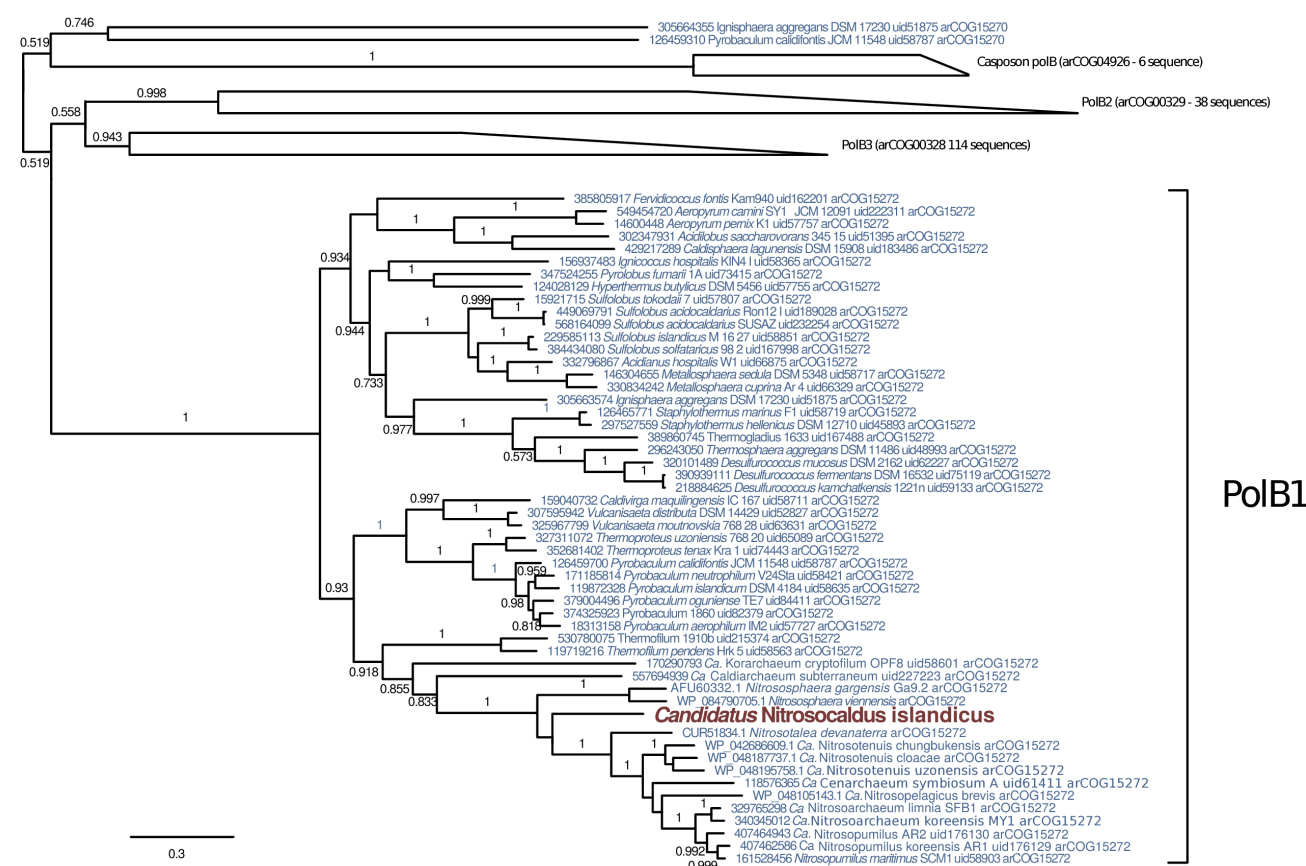

**Fig S7.** Unrooted approximate maximum likelihood tree showing placement of the PolB from *Ca. Nitrosocaldus islandicus* as a member of the PolB1 clade. The tree was calculated using FastTree<sup>31</sup> on 213 sequences aligned with mafft<sup>32</sup> (3058 aligned positions). Branch support greater than 0.5 is indicated on internal branches. PolB2, PolB3 and Casposon-related PolB (named according to 33) have been collapsed into right trapezoids in which the bases indicate shortest and longest terminal branches within each clade.

## References

1. Hallam, S. J. *et al.* Genomic analysis of the uncultivated marine crenarchaeote *Cenarchaeum symbiosum*. *Proc. Natl. Acad. Sci.* **103**, 18296–18301 (2006).
2. Lehtovirta-Morley, L. E. *et al.* Identifying potential mechanisms enabling acidophily in the ammonia-oxidising archaeon ‘*Candidatus Nitrosotalea devanattera*’. *Appl. Environ. Microbiol.* AEM.04031-15 (2016). doi:10.1128/AEM.04031-15
3. Blainey, P. C., Mosier, A. C., Potanina, A., Francis, C. A. & Quake, S. R. Genome of a low-salinity ammonia-oxidizing archaeon determined by single-cell and metagenomic analysis. *PLoS ONE* **6**, (2011).
4. Zhalnina, K. V. *et al.* Genome sequence of *Candidatus Nitrososphaera evergladensis* from group I.1b enriched from Everglades soil reveals novel genomic features of the ammonia-oxidizing archaea. *PLoS ONE* **9**, e101648 (2014).
5. Butterfield, C. N. *et al.* Proteogenomic analyses indicate bacterial methylotrophy and archaeal heterotrophy are prevalent below the grass root zone. *PeerJ* **4**, e2687 (2016).
6. Kamanda Ngugi, D. *et al.* Comparative genomics reveals adaptations of a halotolerant *thaumarchaeon* in the interfaces of brine pools in the Red Sea. *ISME J.* **9**, 396–411 (2015).
7. Haroon, M. F., Thompson, L. R., Parks, D. H., Hugenholtz, P. & Stingl, U. A catalogue of 136 microbial draft genomes from Red Sea metagenomes. *Sci. Data* **3**, (2016).
8. Walker, C. B. *et al.* *Nitrosopumilus maritimus* genome reveals unique mechanisms for nitrification and autotrophy in globally distributed marine crenarchaea. *Proc. Natl. Acad. Sci. U. S. A.* **107**, 8818–8823 (2010).
9. Santoro, A. E. *et al.* Genomic and proteomic characterization of “*Candidatus Nitrosopelagicus brevis*”: An ammonia-oxidizing archaeon from the open ocean. *Proc. Natl. Acad. Sci.* **112**, 1173–1178 (2015).
10. Kerou, M. *et al.* Proteomics and comparative genomics of *Nitrososphaera viennensis* reveal the core genome and adaptations of archaeal ammonia oxidizers. *Proc. Natl. Acad. Sci.* **113**, E7937–E7946 (2016).
11. Hug, L. A. *et al.* Critical biogeochemical functions in the subsurface are associated with bacteria from new phyla and little studied lineages. *Environ. Microbiol.* **18**, 159–173 (2016).
12. Ahlgren, N. A. *et al.* Genome and epigenome of a novel marine *Thaumarchaeota* strain suggest viral infection, phosphorothioation DNA modification and multiple restriction systems. *Environ. Microbiol.* n/a-n/a (2017). doi:10.1111/1462-2920.13768
13. Jung, M.-Y. *et al.* A hydrophobic ammonia-oxidizing archaeon of the *Nitrosocosmicus* clade isolated from coal tar-contaminated sediment. *Environ. Microbiol. Rep.* **8**, 983–992 (2016).
14. Mosier, A. C., Allen, E. E., Kim, M., Ferriera, S. & Francis, C. A. Genome sequence of “*Candidatus Nitrosoarchaeum limnia*” BG20, a low-salinity ammonia-oxidizing archaeon from the San Francisco Bay estuary. *J Bacteriol* **194**, 2119–2120 (2012).

15. Mosier, A. C., Allen, E. E., Kim, M., Ferriera, S. & Francis, C. A. Genome sequence of “*Candidatus Nitrosopumilus salaria*” BD31, an ammonia-oxidizing archaeon from the San Francisco Bay estuary. *J. Bacteriol.* **194**, 2121–2122 (2012).
16. Park, S.-J. *et al.* Draft genome sequence of an ammonia-oxidizing archaeon, “*Candidatus Nitrosopumilus koreensis*” AR1, from marine sediment. *J. Bacteriol.* **194**, 6940–6941 (2012).
17. Park, S. J. *et al.* Draft genome sequence of an ammonia-oxidizing archaeon, ‘*Candidatus Nitrosopumilus sediminis*’ AR2, from Svalbard in the arctic circle. *J. Bacteriol.* **194**, 6948–6949 (2012).
18. Kim, B. K. *et al.* Genome sequence of an ammonia-oxidizing soil archaeon, “*Candidatus Nitrosoarchaeum koreensis*” MY1. *J. Bacteriol.* **193**, 5539–5540 (2011).
19. Bayer, B. *et al.* Physiological and genomic characterization of two novel marine *thaumarchaeal* strains indicates niche differentiation. *ISME J.* **10**, 1051–1063 (2016).
20. Sauder, L. A. *et al.* Cultivation and characterization of *Candidatus Nitrosocosmicus exaquare*, an ammonia-oxidizing archaeon from a municipal wastewater treatment system. *ISME J.* **11**, 1142–1157 (2017).
21. Li, Y. *et al.* A novel ammonia-oxidizing archaeon from wastewater treatment plant: Its enrichment, physiological and genomic characteristics. *Sci. Rep.* **6**, (2016).
22. Jung, M.-Y. *et al.* A mesophilic, autotrophic, ammonia-oxidizing archaeon of *thaumarchaeal* group I.1a cultivated from a deep oligotrophic soil horizon. *Appl. Environ. Microbiol.* **80**, 3645–3655 (2014).
23. Spang, A. *et al.* The genome of the ammonia-oxidizing *Candidatus Nitrososphaera gargensis*: insights into metabolic versatility and environmental adaptations. *Environ. Microbiol.* **14**, 3122–3145 (2012).
24. Hugerth, L. W. *et al.* Metagenome-assembled genomes uncover a global brackish microbiome. *Genome Biol.* **16**, 279 (2015).
25. Lebedeva, E. V. *et al.* Enrichment and genome sequence of the group I. 1a ammonia-oxidizing archaeon ‘*Ca. Nitrosotenuis uzonensis*’ representing a clade globally distributed in thermal habitats. *Plos One* **8**, (2013).
26. Mende, D. R., Aylward, F. O., Eppley, J. M., Nielsen, T. N. & DeLong, E. F. Improved environmental genomes via integration of metagenomic and single-cell assemblies. *Front. Microbiol.* **7**, (2016).
27. Herbold CW, Lehtovirta-Morley LE, Jung M-Y, Jehmlich N, Hausmann B, Han P, *et al.* Ammonia-oxidising archaea living at low pH: Insights from comparative genomics. *Environ Microbiol*, in press (2017).
28. Stieglmeier M, Alves RJE, Schleper C. The Phylum Thaumarchaeota. In: Rosenberg E, DeLong EF, Lory S, Stackebrandt E, Thompson F (eds). *The Prokaryotes*. Springer Berlin Heidelberg, pp 347–362 (2014).



29. Pace HC and Brenner C. (2001). The nitrilase superfamily: classification, structure and function. *Genome Biol* 2: reviews0001.1-reviews0001.9.
30. Gibson M, Chen P-T, Drennan CL. (2016). A structural phylogeny for understanding 2-oxoacid oxidoreductase function - ScienceDirect. *Curr Opin Struct Biol* 41: 54–61.
31. Price, M. N., Dehal, P. S. & Arkin, A. P. FastTree: computing large minimum evolution trees with profiles instead of a distance matrix. *Mol. Biol. Evol.* 26, 1641–50 (2009).
32. Katoh, K., Misawa, K., Kuma, K. & Miyata, T. MAFFT: a novel method for rapid multiple sequence alignment based on fast Fourier transform. *Nucleic Acids Res.* 30, 3059–3066 (2002).
33. Makarova, K. S., Krupovic, M. & Koonin, E. V. Evolution of replicative DNA polymerases in archaea and their contributions to the eukaryotic replication machinery. *Front. Microbiol.* 5, (2014).
